# Supplementary material for: Identification and Characterization of Long Non-Coding RNAs Related to Mouse Embryonic Brain Development from Available Transcriptomic Data
Source: PLoS One. 2013 Aug 14;8(8):e71152. doi: 10.1371/journal.pone.0071152 (PMC3743905; doi:10.1371/journal.pone.0071152)
Supplement: Table S2 — Details of putative embryonic brain lncRNAs by RT-PCR. (XLS) [file pone.0071152.s007.xls]

## Sheet: Table S2
Supplementary Table S2 Details of putative embryonic brain lncRNAs by RT-PCR.
Chr	Start	End	ID	Strand	Exon start	Exon end
chr1	9932106	9934199	cisantisense_lncRNA_1	+	9932106,9932404,9932691,9934101,	9932236,9932662,9932798,9934199,
chr12	118472348	118503003	cisantisense_lncRNA_2	-	118472348,118498487,	118473141,118503003,
chr13	10121457	10360350	cisantisense_lncRNA_3	-	10121457,10223891,10359510,	10121535,10224003,10360350,
chr14	26514803	26519914	cisantisense_lncRNA_4	-	26514803,26517735,	26517308,26519914,
chr14	55587624	55594912	cisantisense_lncRNA_5	+	55587624,55590247,55591602,55592132,55592715,	55587684,55590327,55591749,55592363,55594912,
chr14	55672316	55711295	cisantisense_lncRNA_6	+	55672316,55693498,	55693200,55711295,
chr14	62221312	62233247	cisantisense_lncRNA_7	-	62221312,62233003,	62222643,62233247,
chr16	66655539	66663456	cisantisense_lncRNA_8	+	66655539,66660290,	66657447,66663456,
chr17	95149440	95163298	cisantisense_lncRNA_9	+	95149440,95154551,95155774,95160838,95161802,95163112,	95149572,95154645,95155863,95160944,95162028,95163298,
chr7	6908397	6920010	cisantisense_lncRNA_10	-	6908397,6913763,	6908603,6920010,
chr7	26181139	26354366	cisantisense_lncRNA_11	+	26181139,26181597,26202420,26316086,26316310,26350811,	26181408,26181995,26202528,26316176,26316481,26354366,
chr7	48104523	48158346	cisantisense_lncRNA_12	-	48104523,48129475,48130308,48153569,	48106870,48129629,48131108,48158346,
chr1	193179378	193179596	cisantisense_lncRNA_13	+	193179378,	193179596,
chr1	65155417	65155653	cisantisense_lncRNA_14	+	65155417,	65155653,
chr10	128162543	128162853	cisantisense_lncRNA_15	+	128162543,	128162853,
chr11	82715383	82715967	cisantisense_lncRNA_16	+	82715383,	82715967,
chr11	23394142	23394526	cisantisense_lncRNA_17	+	23394142,	23394526,
chr11	29123519	29123777	cisantisense_lncRNA_18	+	29123519,	29123777,
chr11	76015828	76016043	cisantisense_lncRNA_19	+	76015828,	76016043,
chr11	116096970	116097244	cisantisense_lncRNA_20	+	116096970,	116097244,
chr11	3131990	3132510	cisantisense_lncRNA_21	+	3131990,	3132510,
chr11	72271014	72271582	cisantisense_lncRNA_22	+	72271014,	72271582,
chr13	43500776	43501343	cisantisense_lncRNA_23	+	43500776,	43501343,
chr13	78329977	78331553	cisantisense_lncRNA_24	+	78332089,	78332291,
chr13	56192839	56193186	cisantisense_lncRNA_25	+	56192839,	56193186,
chr13	72759981	72766407	cisantisense_lncRNA_26	-	72759981,	72766407,
chr14	19102187	19102407	cisantisense_lncRNA_27	+	19102187,	19102407,
chr14	122861964	122862229	cisantisense_lncRNA_28	+	122861964,	122862229,
chr16	4622277	4622485	cisantisense_lncRNA_29	+	4622277,	4622485,
chr16	18408264	18409928	cisantisense_lncRNA_30	+	18408264,	18409928,
chr16	77595744	77596034	cisantisense_lncRNA_31	+	77595744,	77596034,
chr16	4620715	4621038	cisantisense_lncRNA_32	+	4620715,	4621038,
chr18	32536078	32536376	cisantisense_lncRNA_33	+	32536078,	32536376,
chr19	6064206	6064571	cisantisense_lncRNA_34	+	6064206,	6064571,
chr2	124932295	124932507	cisantisense_lncRNA_35	+	124932295,	124932507,
chr2	25156097	25156613	cisantisense_lncRNA_36	+	25156097,	25156613,
chr2	48763847	48764148	cisantisense_lncRNA_37	+	48763847,	48764148,
chr2	90740332	90740568	cisantisense_lncRNA_38	+	90740332,	90740568,
chr2	90386983	90387305	cisantisense_lncRNA_39	+	90386983,	90387305,
chr2	129656002	129656837	cisantisense_lncRNA_40	-	129656002,	129656837,
chr2	31495256	31495477	cisantisense_lncRNA_41	+	31495256,	31495477,
chr3	35833790	35834109	cisantisense_lncRNA_42	+	35833790,	35834109,
chr3	84031275	84031555	cisantisense_lncRNA_43	+	84031275,	84031555,
chr3	89015636	89015904	cisantisense_lncRNA_44	+	89015636,	89015904,
chr3	37308509	37308792	cisantisense_lncRNA_45	+	37308509,	37308792,
chr4	63664336	63664545	cisantisense_lncRNA_46	+	63664336,	63664545,
chr4	82181674	82181959	cisantisense_lncRNA_47	+	82181674,	82181959,
chr4	63665621	63665919	cisantisense_lncRNA_48	+	63665621,	63665919,
chr4	154992044	154992515	cisantisense_lncRNA_49	+	154992044,	154992515,
chr5	24377747	24378140	cisantisense_lncRNA_50	+	24377747,	24378140,
chr5	24103708	24103918	cisantisense_lncRNA_51	+	24103708,	24103918,
chr5	24384159	24384423	cisantisense_lncRNA_52	+	24384159,	24384423,
chr5	68032053	68032477	cisantisense_lncRNA_53	+	68032053,	68032477,
chr5	123614160	123614608	cisantisense_lncRNA_54	+	123614160,	123614608,
chr5	108174165	108174909	cisantisense_lncRNA_55	+	108174165,	108174909,
chr5	115786021	115786832	cisantisense_lncRNA_56	+	115786021,	115786832,
chr5	120938977	120939256	cisantisense_lncRNA_57	+	120938977,	120939256,
chr6	52127011	52127466	cisantisense_lncRNA_58	+	52127011,	52127466,
chr6	125113793	125114070	cisantisense_lncRNA_59	+	125113793,	125114070,
chr6	6816479	6817024	cisantisense_lncRNA_60	+	6816479,	6817024,
chr6	86937969	86941900	cisantisense_lncRNA_61	-	86937969,	86941900,
chr6	50148648	50149641	cisantisense_lncRNA_62	+	50148648,	50149641,
chr7	137908351	137908802	cisantisense_lncRNA_63	+	137908351,	137908802,
chr7	139166997	139167388	cisantisense_lncRNA_64	+	139166997,	139167388,
chr7	31520786	31521616	cisantisense_lncRNA_65	+	31520786,	31521616,
chr7	133999581	134000179	cisantisense_lncRNA_66	+	133999581,	134000179,
chr7	17043779	17044138	cisantisense_lncRNA_67	+	17043779,	17044138,
chr7	20443713	20443919	cisantisense_lncRNA_68	+	20443713,	20443919,
chr8	74161906	74162337	cisantisense_lncRNA_69	+	74161906,	74162337,
chr8	74162401	74162650	cisantisense_lncRNA_70	+	74162401,	74162650,
chr8	107856376	107856595	cisantisense_lncRNA_71	+	107856376,	107856595,
chr8	72823761	72824172	cisantisense_lncRNA_72	+	72823761,	72824172,
chr8	3614988	3615372	cisantisense_lncRNA_73	+	3614988,	3615372,
chr8	4200400	4200714	cisantisense_lncRNA_74	+	4200400,	4200714,
chr8	74167810	74168112	cisantisense_lncRNA_75	+	74167810,	74168112,
chr8	86199570	86200000	cisantisense_lncRNA_76	+	86199570,	86200000,
chr9	86450393	86450675	cisantisense_lncRNA_77	+	86450393,	86450675,
chr9	3029883	3030239	cisantisense_lncRNA_78	+	3029883,	3030239,
chr9	112129569	112130004	cisantisense_lncRNA_79	+	112129569,	112130004,
chr9	48278125	48278335	cisantisense_lncRNA_80	+	48278125,	48278335,
chrX	133271975	133272245	cisantisense_lncRNA_81	+	133271975,	133272245,
chrX	165735328	165735727	cisantisense_lncRNA_82	+	165735328,	165735727,
chr1	15706102	15706390	intergenic_lncRNA_1	+	15706102,	15706390,
chr1	20986858	20990362	intergenic_lncRNA_2	-	20986858,20987432,20987953,20988897,	20987163,20987666,20988300,20990362,
chr1	43805353	43805901	intergenic_lncRNA_3	-	43805353,	43805901,
chr1	60394236	60394866	intergenic_lncRNA_4	+	60394236,	60394866,
chr1	68078813	68083650	intergenic_lncRNA_5	-	68078813,68083135,	68079138,68083650,
chr1	74747651	74748305	intergenic_lncRNA_6	+	74747651,	74748305,
chr1	75557634	75558145	intergenic_lncRNA_7	+	75557634,	75558145,
chr1	80261754	80262308	intergenic_lncRNA_8	-	80261754,	80262308,
chr1	93184725	93185177	intergenic_lncRNA_9	+	93184725,	93185177,
chr1	108660669	108663420	intergenic_lncRNA_10	-	108660669,108661198,108662757,	108660886,108661778,108663420,
chr1	132425590	132425858	intergenic_lncRNA_11	+	132425590,	132425858,
chr1	136647148	136649071	intergenic_lncRNA_12	+	136647148,	136649071,
chr1	145446009	145448948	intergenic_lncRNA_13	-	145446009,145447509,145448720,	145446384,145448217,145448948,
chr1	153568289	153568991	intergenic_lncRNA_14	+	153568289,	153568991,
chr1	164462342	164462710	intergenic_lncRNA_15	-	164462342,	164462710,
chr1	179359189	179359499	intergenic_lncRNA_16	-	179359189,	179359499,
chr1	180186240	180186574	intergenic_lncRNA_17	+	180186240,	180186574,
chr1	183156154	183158616	intergenic_lncRNA_18	+	183156154,183157174,183157896,	183156851,183157790,183158616,
chr10	11179219	11179426	intergenic_lncRNA_19	+	11179219,	11179426,
chr10	13238275	13238758	intergenic_lncRNA_20	+	13238275,	13238758,
chr10	24358476	24359550	intergenic_lncRNA_21	-	24358476,24359015,	24358677,24359550,
chr10	35429038	35429503	intergenic_lncRNA_22	-	35429038,	35429503,
chr10	66376071	66381745	intergenic_lncRNA_23	-	66376071,66381492,	66376350,66381745,
chr10	80144611	80145234	intergenic_lncRNA_24	+	80144611,	80145234,
chr10	92238381	92238806	intergenic_lncRNA_25	-	92238381,	92238806,
chr10	93428290	93429642	intergenic_lncRNA_26	-	93428290,	93429642,
chr10	116019808	116020588	intergenic_lncRNA_27	+	116019808,	116020588,
chr10	128067907	128068344	intergenic_lncRNA_28	-	128067907,	128068344,
chr11	16815054	16817550	intergenic_lncRNA_29	+	16815054,16815858,16817061,	16815776,16816573,16817550,
chr11	22968077	22973344	intergenic_lncRNA_30	+	22968077,22972873,	22968410,22973344,
chr11	31997290	31997504	intergenic_lncRNA_31	-	31997290,	31997504,
chr11	44819711	44820088	intergenic_lncRNA_32	+	44819711,	44820088,
chr11	51938061	51938432	intergenic_lncRNA_33	+	51938061,	51938432,
chr11	54177098	54177488	intergenic_lncRNA_34	+	54177098,	54177488,
chr11	58675016	58675448	intergenic_lncRNA_35	+	58675016,	58675448,
chr11	60673288	60673615	intergenic_lncRNA_36	+	60673288,	60673615,
chr11	74634106	74639323	intergenic_lncRNA_37	+	74634106,74636585,74638691,	74634314,74637025,74639323,
chr11	75111850	75112341	intergenic_lncRNA_38	-	75111850,	75112341,
chr11	77026020	77026288	intergenic_lncRNA_39	+	77026020,	77026288,
chr11	78658506	78659033	intergenic_lncRNA_40	+	78658506,	78659033,
chr11	82593108	82593359	intergenic_lncRNA_41	-	82593108,	82593359,
chr11	83857380	83857739	intergenic_lncRNA_42	+	83857380,	83857739,
chr11	85003017	85003462	intergenic_lncRNA_43	-	85003017,	85003462,
chr11	93999827	94000059	intergenic_lncRNA_44	+	93999827,	94000059,
chr11	95930243	95932628	intergenic_lncRNA_45	-	95930243,	95932628,
chr11	102140420	102140723	intergenic_lncRNA_46	+	102140420,	102140723,
chr11	106256665	106256942	intergenic_lncRNA_47	-	106256665,	106256942,
chr11	107550243	107555008	intergenic_lncRNA_48	+	107550243,107554649,	107550738,107555008,
chr11	113638519	113640426	intergenic_lncRNA_49	-	113638519,113639973,	113639126,113640426,
chr11	115141677	115142897	intergenic_lncRNA_50	-	115141677,115142135,	115141931,115142897,
chr11	120453510	120453826	intergenic_lncRNA_51	-	120453510,	120453826,
chr12	25322887	25323448	intergenic_lncRNA_52	-	25322887,	25323448,
chr12	34058366	34059595	intergenic_lncRNA_53	+	34058366,	34059595,
chr12	58597447	58598107	intergenic_lncRNA_54	+	58597447,	58598107,
chr12	88767213	88767981	intergenic_lncRNA_55	-	88767213,	88767981,
chr12	110933585	110937816	intergenic_lncRNA_56	+	110933796,110936837,	110934339,110937816,
chr12	112352786	112353697	intergenic_lncRNA_57	+	112352786,	112353697,
chr12	120477290	120479408	intergenic_lncRNA_58	+	120477290,	120479408,
chr13	14719326	14719572	intergenic_lncRNA_59	+	14719326,	14719572,
chr13	28547317	28551720	intergenic_lncRNA_60	-	28547317,	28551720,
chr13	99091433	99091801	intergenic_lncRNA_61	+	99091433,	99091801,
chr13	99609005	99609452	intergenic_lncRNA_62	-	99609005,	99609452,
chr14	29339938	29340319	intergenic_lncRNA_63	+	29339938,	29340319,
chr14	35560554	35561101	intergenic_lncRNA_64	+	35560554,	35561101,
chr14	36396204	36396551	intergenic_lncRNA_65	+	36396204,	36396551,
chr14	47912737	47915756	intergenic_lncRNA_66	+	47912737,47913286,47914588,47915117,	47912991,47913588,47915061,47915756,
chr14	71001113	71001470	intergenic_lncRNA_67	-	71001113,	71001470,
chr14	122856410	122857164	intergenic_lncRNA_68	-	122856410,122856803,	122856736,122857164,
chr14	124374330	124374769	intergenic_lncRNA_69	+	124374330,	124374769,
chr15	31550432	31550804	intergenic_lncRNA_70	+	31550432,	31550804,
chr15	52895734	52898245	intergenic_lncRNA_71	-	52895734,52897283,52897622,52898017,	52896038,52897611,52897964,52898245,
chr15	73407853	73408118	intergenic_lncRNA_72	-	73407853,	73408118,
chr15	75382039	75382376	intergenic_lncRNA_73	-	75382039,	75382376,
chr15	98370343	98370563	intergenic_lncRNA_74	-	98370343,	98370563,
chr16	11190585	11190809	intergenic_lncRNA_75	-	11190585,	11190809,
chr16	16417092	16419618	intergenic_lncRNA_76	-	16417092,16417535,	16417448,16419618,
chr16	32016499	32016931	intergenic_lncRNA_77	-	32016499,	32016931,
chr16	33126916	33127511	intergenic_lncRNA_78	+	33126916,	33127511,
chr16	46390094	46393094	intergenic_lncRNA_79	-	46390094,46391651,46392537,	46390378,46392149,46393094,
chr16	59559535	59560069	intergenic_lncRNA_80	-	59559535,	59560069,
chr16	62733151	62733396	intergenic_lncRNA_81	-	62733151,	62733396,
chr16	63543421	63543902	intergenic_lncRNA_82	-	63543421,	63543902,
chr16	76287731	76288653	intergenic_lncRNA_83	-	76287731,76288058,	76287944,76288653,
chr17	15515215	15516398	intergenic_lncRNA_84	+	15515215,15515823,	15515625,15516398,
chr17	15656419	15657248	intergenic_lncRNA_85	+	15656419,15656827,	15656755,15657248,
chr17	30027135	30027523	intergenic_lncRNA_86	+	30027135,	30027523,
chr17	33468077	33468301	intergenic_lncRNA_87	-	33468077,	33468301,
chr17	35303631	35303936	intergenic_lncRNA_88	+	35303631,	35303936,
chr17	55653246	55653849	intergenic_lncRNA_89	+	55653246,	55653849,
chr17	79050611	79052072	intergenic_lncRNA_90	-	79050611,79051573,	79051334,79052072,
chr17	86000092	86000568	intergenic_lncRNA_91	-	86000092,	86000568,
chr18	33359105	33359847	intergenic_lncRNA_92	-	33359105,	33359847,
chr18	36449451	36458819	intergenic_lncRNA_93	+	36449451,36450148,36451159,36451562,36454984,36455632,36456125,36457223,36458529,	36450104,36450398,36451516,36451856,36455391,36456026,36456648,36457491,36458819,
chr18	38371447	38371680	intergenic_lncRNA_94	-	38371447,	38371680,
chr18	43635747	43636041	intergenic_lncRNA_95	-	43635747,	43636041,
chr18	61352620	61355262	intergenic_lncRNA_96	-	61352620,61352998,61354195,61354853,	61352937,61353253,61354824,61355262,
chr19	23799188	23799480	intergenic_lncRNA_97	+	23799188,	23799480,
chr19	28333867	28335690	intergenic_lncRNA_98	-	28333867,28334436,28335088,	28334153,28335050,28335690,
chr19	39043904	39045414	intergenic_lncRNA_99	+	39043904,39045172,	39044162,39045414,
chr19	41347068	41347688	intergenic_lncRNA_100	-	41347068,	41347688,
chr19	41635684	41636288	intergenic_lncRNA_101	+	41635684,	41636288,
chr2	5817724	5818067	intergenic_lncRNA_102	-	5817724,	5818067,
chr2	6367125	6367419	intergenic_lncRNA_103	+	6367125,	6367419,
chr2	13573106	13573473	intergenic_lncRNA_104	-	13573106,	13573473,
chr2	15002205	15004043	intergenic_lncRNA_105	+	15002205,15003166,	15003098,15004043,
chr2	16675413	16676105	intergenic_lncRNA_106	+	16675413,	16676105,
chr2	31073368	31073821	intergenic_lncRNA_107	+	31073368,	31073821,
chr2	33416499	33417204	intergenic_lncRNA_108	-	33416499,	33417204,
chr2	52994741	52996295	intergenic_lncRNA_109	-	52994741,52995058,52995732,52995987,	52994972,52995679,52995939,52996295,
chr2	55287429	55287636	intergenic_lncRNA_110	-	55287429,	55287636,
chr2	55449840	55450495	intergenic_lncRNA_111	+	55449840,	55450495,
chr2	60088325	60088705	intergenic_lncRNA_112	+	60088325,	60088705,
chr2	62535749	62536199	intergenic_lncRNA_113	-	62535749,	62536199,
chr2	68950705	68951699	intergenic_lncRNA_114	+	68950705,	68951699,
chr2	73114909	73115277	intergenic_lncRNA_115	+	73114909,	73115277,
chr2	92807181	92812044	intergenic_lncRNA_116	-	92807181,92810097,92811731,	92807610,92810369,92812044,
chr2	112309184	112312048	intergenic_lncRNA_117	+	112309184,	112312048,
chr2	117007147	117008014	intergenic_lncRNA_118	+	117007147,117007607,	117007509,117008014,
chr2	119432658	119433236	intergenic_lncRNA_119	+	119432658,	119433236,
chr2	130393309	130394022	intergenic_lncRNA_120	+	130393309,	130394022,
chr2	131815753	131816784	intergenic_lncRNA_121	-	131815753,131816501,	131816039,131816784,
chr2	136896938	136897673	intergenic_lncRNA_122	+	136896938,	136897673,
chr2	152546420	152553542	intergenic_lncRNA_122	+	152546420,	152553542,
chr2	156402779	156403150	intergenic_lncRNA_124	+	156402779,	156403150,
chr2	163292114	163293098	intergenic_lncRNA_125	-	163292114,	163293098,
chr2	165199770	165201739	intergenic_lncRNA_126	-	165199770,165201004,	165200428,165201739,
chr2	181289118	181289822	intergenic_lncRNA_127	+	181289118,	181289822,
chr3	17683957	17684564	intergenic_lncRNA_128	-	17683957,	17684564,
chr3	19123591	19123819	intergenic_lncRNA_129	-	19123591,	19123819,
chr3	28570913	28574680	intergenic_lncRNA_130	+	28570913,28574402,	28571239,28574680,
chr3	40598567	40598881	intergenic_lncRNA_131	+	40598567,	40598881,
chr3	40741653	40741969	intergenic_lncRNA_132	+	40741653,	40741969,
chr3	58061777	58060860	intergenic_lncRNA_132	+	58061777,58060687,	58062609,58060860,
chr3	63825753	63826483	intergenic_lncRNA_134	+	63825753,	63826483,
chr3	67280046	67280378	intergenic_lncRNA_135	+	67280046,	67280378,
chr3	88006520	88006838	intergenic_lncRNA_136	+	88006520,	88006838,
chr3	96082517	96082775	intergenic_lncRNA_137	+	96082517,	96082775,
chr3	100272002	100274343	intergenic_lncRNA_138	-	100272002,100273609,	100273152,100274343,
chr3	108258996	108259708	intergenic_lncRNA_139	-	108258996,	108259708,
chr3	121971189	121972802	intergenic_lncRNA_140	+	121971189,	121972802,
chr3	137576639	137579319	intergenic_lncRNA_141	+	137576639,137577142,137578612,	137577090,137577506,137579319,
chr4	3759321	3759895	intergenic_lncRNA_142	-	3759321,3759543,	3759526,3759895,
chr4	6148198	6148826	intergenic_lncRNA_143	+	6148198,6148546,	6148465,6148826,
chr4	11188506	11190385	intergenic_lncRNA_144	-	11188506,11189673,11190028,	11188886,11189949,11190385,
chr4	12163977	12164277	intergenic_lncRNA_145	+	12163977,	12164277,
chr4	14429627	14430591	intergenic_lncRNA_146	-	14429627,14430255,	14430017,14430591,
chr4	24540355	24542102	intergenic_lncRNA_147	-	24540355,24541643,	24540836,24542102,
chr4	48097401	48098620	intergenic_lncRNA_148	+	48097401,48098133,	48097875,48098620,
chr4	56879891	56886619	intergenic_lncRNA_149	-	56879891,56881380,56882300,56883074,56884271,56886004,	56881294,56882254,56883009,56883460,56885836,56886619,
chr4	57004912	57007142	intergenic_lncRNA_150	-	57004912,57006613,	57005120,57007142,
chr4	59037343	59038452	intergenic_lncRNA_151	+	59037343,59038060,	59038008,59038452,
chr4	59768664	59773885	intergenic_lncRNA_152	+	59768664,59769121,59772142,59772402,59772669,59773140,	59769014,59769332,59772350,59772638,59773103,59773885,
chr4	69881380	69882541	intergenic_lncRNA_153	-	69881380,69882202,	69882111,69882541,
chr4	70088130	70090897	intergenic_lncRNA_154	-	70088130,70089924,	70088843,70090897,
chr4	86225110	86226148	intergenic_lncRNA_155	-	86225110,86225853,	86225817,86226148,
chr4	100116449	100116740	intergenic_lncRNA_156	+	100116449,	100116740,
chr4	108236039	108236459	intergenic_lncRNA_157	-	108236039,	108236459,
chr4	108308291	108309020	intergenic_lncRNA_158	-	108308291,	108309020,
chr4	109123415	109125140	intergenic_lncRNA_159	+	109123415,	109125140,
chr4	115486117	115486900	intergenic_lncRNA_160	+	115486117,	115486900,
chr4	118892453	118896737	intergenic_lncRNA_161	-	118892453,118893353,118894734,118896111,	118893308,118893965,118895278,118896737,
chr4	123576352	123576772	intergenic_lncRNA_162	-	123576352,	123576772,
chr4	123579758	123580055	intergenic_lncRNA_163	+	123579758,	123580055,
chr4	125767977	125769443	intergenic_lncRNA_164	+	125767977,125768766,	125768516,125769443,
chr4	128244578	128244841	intergenic_lncRNA_165	+	128244578,	128244841,
chr4	128825318	128826723	intergenic_lncRNA_166	-	128825318,	128826723,
chr4	135900224	135913923	intergenic_lncRNA_167	+	135900224,135905239,135912049,135913718,	135901811,135906218,135912427,135913923,
chr4	138123162	138123574	intergenic_lncRNA_168	-	138123162,	138123574,
chr4	138901665	138902011	intergenic_lncRNA_169	-	138901665,	138902011,
chr7	149797190	149806798	intergenic_lncRNA_169	+	149797190,	149806798,
chr5	53031418	53033147	intergenic_lncRNA_171	-	53031418,53032518,	53032056,53033147,
chr5	53674260	53674624	intergenic_lncRNA_172	+	53674260,	53674624,
chr5	66219417	66220005	intergenic_lncRNA_173	+	66219417,	66220005,
chr5	67749108	67749404	intergenic_lncRNA_174	+	67749108,	67749404,
chr5	75397081	75401446	intergenic_lncRNA_175	-	75397081,75397647,75398822,75400506,75400866,	75397585,75398153,75399053,75400824,75401446,
chr5	77085844	77087477	intergenic_lncRNA_176	+	77085844,77086974,	77086155,77087477,
chr5	77714142	77714989	intergenic_lncRNA_177	+	77714142,77714491,	77714420,77714989,
chr5	92054586	92055741	intergenic_lncRNA_178	+	92054586,92055098,	92055004,92055741,
chr5	96502076	96503234	intergenic_lncRNA_179	-	96502076,	96503234,
chr5	104885203	104885479	intergenic_lncRNA_180	-	104885203,	104885479,
chr5	106039334	106041001	intergenic_lncRNA_181	+	106039334,106039638,106040383,	106039579,106040022,106041001,
chr5	110104600	110165652	intergenic_lncRNA_182	-	110104600,110165018,	110104946,110165652,
chr5	110653388	110654929	intergenic_lncRNA_183	+	110653388,110654012,110654489,	110653676,110654413,110654929,
chr5	115643660	115644374	intergenic_lncRNA_184	-	115643660,115643999,	115643882,115644374,
chr5	115768826	115769214	intergenic_lncRNA_185	+	115768826,	115769214,
chr5	116458365	116458963	intergenic_lncRNA_186	+	116458365,	116458963,
chr5	122016051	122016342	intergenic_lncRNA_187	-	122016051,	122016342,
chr5	137581943	137585950	intergenic_lncRNA_188	-	137581943,137583540,137585677,	137582260,137584705,137585950,
chr5	139473704	139476496	intergenic_lncRNA_189	+	139473704,139476032,	139473937,139476496,
chr5	139624088	139624429	intergenic_lncRNA_190	-	139624088,	139624429,
chr5	143628625	143631918	intergenic_lncRNA_191	-	143628625,143631229,	143629118,143631918,
chr5	151410791	151411009	intergenic_lncRNA_192	-	151410791,	151411009,
chr6	6991302	6991544	intergenic_lncRNA_193	+	6991302,	6991544,
chr6	18805152	18805702	intergenic_lncRNA_194	+	18805152,	18805702,
chr6	31460947	31463994	intergenic_lncRNA_195	+	31460947,31461772,31462803,31463226,31463697,	31461717,31462150,31463141,31463633,31463994,
chr6	36476797	36478298	intergenic_lncRNA_196	+	36476797,36477823,	36477406,36478298,
chr6	38255684	38256049	intergenic_lncRNA_197	-	38255684,	38256049,
chr6	39550551	39551090	intergenic_lncRNA_198	+	39550551,	39551090,
chr6	64617701	64618207	intergenic_lncRNA_199	+	64617701,	64618207,
chr6	145806799	145807366	intergenic_lncRNA_200	-	145806799,	145807366,
chr6	146057330	146058929	intergenic_lncRNA_201	-	146057330,146058034,	146057979,146058929,
chr6	149508406	149511816	intergenic_lncRNA_202	+	149508406,149508795,149509474,149509790,149510332,149510664,149511399,	149508667,149509156,149509722,149510269,149510608,149511209,149511816,
chr7	48882914	48883526	intergenic_lncRNA_203	+	48882914,	48883526,
chr7	63971966	63978035	intergenic_lncRNA_204	-	63971966,63973591,63975032,63975849,63977173,	63973389,63974938,63975629,63976866,63978035,
chr7	85724245	85724602	intergenic_lncRNA_205	+	85724245,	85724602,
chr7	129180895	129181129	intergenic_lncRNA_206	-	129180895,	129181129,
chr7	129229207	129229408	intergenic_lncRNA_207	-	129229207,	129229408,
chr7	139180049	139185465	intergenic_lncRNA_208	+	139180049,139184998,	139180426,139185465,
chr8	18890744	18891180	intergenic_lncRNA_209	+	18890744,	18891180,
chr8	71352578	71353315	intergenic_lncRNA_210	+	71352578,	71353315,
chr8	74706537	74706813	intergenic_lncRNA_211	+	74706537,	74706813,
chr8	85952101	85952374	intergenic_lncRNA_212	+	85952101,	85952374,
chr8	86588682	86589037	intergenic_lncRNA_213	-	86588682,	86589037,
chr8	108238553	108238845	intergenic_lncRNA_214	-	108238553,	108238845,
chr9	14640115	14640420	intergenic_lncRNA_215	+	14640115,	14640420,
chr9	15546195	15546657	intergenic_lncRNA_216	+	15546195,	15546657,
chr9	42326224	42326668	intergenic_lncRNA_217	-	42326224,	42326668,
chr9	69228655	69236053	intergenic_lncRNA_218	+	69228655,69229328,69230004,69230674,	69229269,69229994,69230590,69236053,
chr9	72796107	72796943	intergenic_lncRNA_219	+	72796107,	72796943,
chr9	89772823	89773118	intergenic_lncRNA_219	+	89772823,	89773118,
chr9	90573182	90592359	intergenic_lncRNA_219	+	90573182,90576036,90582266,	90574718,90576958,90592359,
chr9	96968607	96972182	intergenic_lncRNA_222	+	96968607,96971591,	96968837,96972182,
chr9	110021007	110022157	intergenic_lncRNA_223	+	110021007,	110022157,
chrX	6212980	6214384	intergenic_lncRNA_224	+	6212980,6214053,	6213296,6214384,
chrX	6732093	6733889	intergenic_lncRNA_225	-	6732093,	6733889,
chrX	20096171	20097022	intergenic_lncRNA_226	+	20096171,	20097022,
chrX	39881142	39882300	intergenic_lncRNA_227	+	39881142,39881896,	39881795,39882300,
chrX	74906635	74907934	intergenic_lncRNA_228	+	74906635,74907098,	74907049,74907934,
chrX	83986843	83987742	intergenic_lncRNA_229	-	83986843,83987426,	83987067,83987742,
chrX	91520134	91520730	intergenic_lncRNA_230	+	91520134,	91520730,
chrX	93125988	93127724	intergenic_lncRNA_231	+	93125988,93127511,	93126190,93127724,
chrX	98517972	98521283	intergenic_lncRNA_232	+	98517972,	98521283,
chrX	103477323	103480187	intergenic_lncRNA_233	-	103477323,103479842,	103477633,103480187,
chrX	105932612	105935465	intergenic_lncRNA_234	-	105932612,105933820,105934918,	105933203,105934828,105935465,
chrX	108683704	108684113	intergenic_lncRNA_235	-	108683704,	108684113,
chrX	118021616	118022946	intergenic_lncRNA_236	+	118021616,118022176,118022656,	118022124,118022589,118022946,
chrX	155805663	155806089	intergenic_lncRNA_237	+	155805663,	155806089,
chrX	158272305	158272549	intergenic_lncRNA_238	-	158272305,	158272549,
chr12	120396525	120396885	intergenic_lncRNA_239	-	120396525,	120396885,
chr12	120397117	120398041	intergenic_lncRNA_240	-	120397117,	120398041,
chr12	120398060	120398719	intergenic_lncRNA_241	-	120398060,	120398719,
chr12	120398776	120399162	intergenic_lncRNA_242	-	120398776,	120399162,
chr12	120399395	120399830	intergenic_lncRNA_243	-	120399395,	120399830,
chr1	171410464	171414139	intergenic_lncRNA_244	-	171410464,171414097,	171410874,171414139,
chr10	84213851	84217988	intergenic_lncRNA_245	-	84213851,84217958,	84215415,84217988,
chr13	62840266	62848174	intergenic_lncRNA_246	-	62840266,62847962,	62840458,62848174,
chr13	43612632	43613073	intergenic_lncRNA_247	+	43612632,43612920,	43612757,43613073,
chr17	22429249	22446613	intergenic_lncRNA_248	-	22429249,22446172,22446472,	22429422,22446281,22446613,
chr17	10090805	10099782	intergenic_lncRNA_249	-	10090805,10099472,	10090857,10099782,
chr17	87354686	87360084	intergenic_lncRNA_250	-	87354686,87359916,	87355331,87360084,
chr2	111997913	112041140	intergenic_lncRNA_251	-	111997913,111998653,112040692,	111997965,111998900,112041140,
chr4	11104791	11109653	intergenic_lncRNA_252	-	11104791,11109608,	11105821,11109653,
chr5	138782740	138785620	intergenic_lncRNA_253	+	138782740,138783814,138784018,	138783737,138783937,138785620,
chr7	143239765	143307661	intergenic_lncRNA_254	+	143239765,143247108,143306647,	143239915,143247154,143307661,
chr7	69192612	69208960	intergenic_lncRNA_255	-	69192612,69208819,	69192691,69208960,
chr7	125735860	125740324	intergenic_lncRNA_256	+	125735860,125739939,	125735974,125740324,
chr7	143255263	143307661	intergenic_lncRNA_257	+	143255263,143306647,	143255370,143307661,
chr7	128733296	128782882	intergenic_lncRNA_258	-	128733296,128781490,128782460,	128733616,128781560,128782882,
chr8	10185163	10185744	intergenic_lncRNA_259	+	10185163,10185728,	10185436,10185744,
chr9	68394830	68409984	intergenic_lncRNA_260	-	68394830,68405810,68406205,68409860,	68394883,68405891,68406336,68409984,
chrX	100219409	100222601	intergenic_lncRNA_261	-	100219409,100221981,100222386,	100221066,100222073,100222601,
chr1	9532345	9532574	intergenic_lncRNA_262	-	9532345,	9532574,
chr1	13552406	13552672	intergenic_lncRNA_263	+	13552406,	13552672,
chr1	16671922	16672183	intergenic_lncRNA_264	+	16671922,	16672183,
chr1	42779225	42779519	intergenic_lncRNA_265	+	42779225,	42779519,
chr1	74317890	74318226	intergenic_lncRNA_266	-	74317890,	74318226,
chr1	94067042	94067423	intergenic_lncRNA_267	-	94067042,	94067423,
chr1	100530573	100531203	intergenic_lncRNA_268	+	100530573,	100531203,
chr1	100554663	100555031	intergenic_lncRNA_269	+	100554663,	100555031,
chr1	121234005	121234300	intergenic_lncRNA_270	+	121234005,	121234300,
chr1	139805327	139807281	intergenic_lncRNA_271	+	139805327,	139807281,
chr1	139839781	139840381	intergenic_lncRNA_272	-	139839781,	139840381,
chr1	139887439	139887640	intergenic_lncRNA_273	+	139887439,	139887640,
chr1	161466146	161466354	intergenic_lncRNA_274	+	161466146,	161466354,
chr1	42796842	42797213	intergenic_lncRNA_275	+	42796842,	42797213,
chr1	64259905	64260168	intergenic_lncRNA_276	-	64259905,	64260168,
chr1	73894876	73895351	intergenic_lncRNA_277	-	73894876,	73895351,
chr1	100489658	100490095	intergenic_lncRNA_278	+	100489658,	100490095,
chr1	100490550	100491084	intergenic_lncRNA_279	+	100490550,	100491084,
chr1	100571327	100571703	intergenic_lncRNA_280	+	100571327,	100571703,
chr1	123030123	123030362	intergenic_lncRNA_281	+	123030123,	123030362,
chr1	139818122	139818832	intergenic_lncRNA_282	+	139818122,	139818832,
chr1	181561372	181561707	intergenic_lncRNA_283	-	181561372,	181561707,
chr1	183147086	183147322	intergenic_lncRNA_284	+	183147086,	183147322,
chr1	167977460	167977839	intergenic_lncRNA_285	+	167977460,	167977839,
chr1	24602098	24602312	intergenic_lncRNA_286	+	24602098,	24602312,
chr1	41964883	41965126	intergenic_lncRNA_287	+	41964883,	41965126,
chr10	32519054	32519263	intergenic_lncRNA_288	-	32519054,	32519263,
chr10	32526085	32526299	intergenic_lncRNA_289	-	32526085,	32526299,
chr10	32600553	32600844	intergenic_lncRNA_290	-	32600553,	32600844,
chr10	66464262	66464548	intergenic_lncRNA_291	-	66464262,	66464548,
chr10	72177454	72177768	intergenic_lncRNA_292	-	72177454,	72177768,
chr10	81559504	81559760	intergenic_lncRNA_293	+	81559504,	81559760,
chr10	100196990	100197380	intergenic_lncRNA_294	-	100196990,	100197380,
chr10	120355595	120355886	intergenic_lncRNA_295	+	120355595,	120355886,
chr10	22119335	22119901	intergenic_lncRNA_296	-	22119335,	22119901,
chr10	32309712	32310021	intergenic_lncRNA_297	-	32309712,	32310021,
chr10	32344745	32344972	intergenic_lncRNA_298	-	32344745,	32344972,
chr10	32555333	32555764	intergenic_lncRNA_299	-	32555333,	32555764,
chr10	9261983	9262350	intergenic_lncRNA_300	-	9261983,	9262350,
chr10	88290870	88291216	intergenic_lncRNA_301	-	88290870,	88291216,
chr10	109454522	109454784	intergenic_lncRNA_302	-	109454522,	109454784,
chr10	22065493	22065838	intergenic_lncRNA_303	+	22065493,	22065838,
chr10	50611292	50611533	intergenic_lncRNA_304	-	50611292,	50611533,
chr11	5164659	5164878	intergenic_lncRNA_305	-	5164659,	5164878,
chr11	79530079	79530471	intergenic_lncRNA_306	+	79530079,	79530471,
chr11	20091691	20091985	intergenic_lncRNA_307	-	20091691,	20091985,
chr11	62046138	62046353	intergenic_lncRNA_308	-	62046138,	62046353,
chr11	77434326	77434765	intergenic_lncRNA_309	-	77434326,	77434765,
chr11	77687499	77687825	intergenic_lncRNA_310	+	77687499,	77687825,
chr11	120446820	120447253	intergenic_lncRNA_311	-	120446820,	120447253,
chr11	77025409	77027210	intergenic_lncRNA_312	+	77025409,	77027210,
chr11	3000951	3001481	intergenic_lncRNA_313	-	3000951,	3001481,
chr12	110730848	110732017	intergenic_lncRNA_313	+	110730848,	110732017,
chr12	17912879	17913199	intergenic_lncRNA_315	+	17912879,	17913199,
chr12	17919514	17920915	intergenic_lncRNA_316	+	17919514,	17920915,
chr12	84785645	84785856	intergenic_lncRNA_317	-	84785645,	84785856,
chr12	84813825	84814114	intergenic_lncRNA_318	-	84813825,	84814114,
chr12	100768413	100768831	intergenic_lncRNA_319	-	100768413,	100768831,
chr12	100789655	100790016	intergenic_lncRNA_320	-	100789655,	100790016,
chr12	17950441	17950717	intergenic_lncRNA_321	+	17950441,	17950717,
chr12	84819895	84820289	intergenic_lncRNA_322	-	84819895,	84820289,
chr12	84827183	84827414	intergenic_lncRNA_323	+	84827183,	84827414,
chr12	84947255	84947628	intergenic_lncRNA_324	-	84947255,	84947628,
chr12	105832038	105832492	intergenic_lncRNA_324	+	105832038,	105832492,
chr12	119555166	119555423	intergenic_lncRNA_326	+	119555166,	119555423,
chr12	110086286	110086604	intergenic_lncRNA_327	+	110086286,	110086604,
chr13	3418358	3418647	intergenic_lncRNA_328	-	3418358,	3418647,
chr13	10241425	10241670	intergenic_lncRNA_329	-	10241425,	10241670,
chr13	10322292	10322566	intergenic_lncRNA_330	-	10322292,	10322566,
chr13	10356453	10356847	intergenic_lncRNA_331	-	10356453,	10356847,
chr13	54769567	54769806	intergenic_lncRNA_332	+	54769567,	54769806,
chr13	62645181	62646824	intergenic_lncRNA_333	-	62645181,	62646824,
chr13	62835381	62835662	intergenic_lncRNA_334	-	62835381,	62835662,
chr13	67111100	67111957	intergenic_lncRNA_335	-	67111100,	67111957,
chr13	67556299	67556635	intergenic_lncRNA_336	-	67556299,	67556635,
chr13	101701704	101702025	intergenic_lncRNA_337	+	101701704,	101702025,
chr13	102570358	102570569	intergenic_lncRNA_338	+	102570358,	102570569,
chr13	107836536	107836814	intergenic_lncRNA_339	+	107836536,	107836814,
chr13	111193099	111193406	intergenic_lncRNA_340	-	111193099,	111193406,
chr13	55807252	55807940	intergenic_lncRNA_341	-	55807252,	55807940,
chr13	74626928	74627401	intergenic_lncRNA_342	-	74626928,	74627401,
chr13	74654886	74655255	intergenic_lncRNA_343	-	74654886,	74655255,
chr13	74751244	74751718	intergenic_lncRNA_344	-	74751244,	74751718,
chr13	83907194	83907427	intergenic_lncRNA_345	+	83907194,	83907427,
chr13	83920774	83920994	intergenic_lncRNA_346	+	83920774,	83920994,
chr13	83923948	83924256	intergenic_lncRNA_347	+	83923948,	83924256,
chr13	97415641	97415878	intergenic_lncRNA_348	+	97415641,	97415878,
chr13	75785747	75785963	intergenic_lncRNA_349	+	75785747,	75785963,
chr13	39926045	39926372	intergenic_lncRNA_350	-	39926045,	39926372,
chr13	28547317	28551720	intergenic_lncRNA_351	+	28547317,	28551720,
chr14	26208279	26208524	intergenic_lncRNA_352	-	26208279,	26208524,
chr14	100576133	100576413	intergenic_lncRNA_353	-	100576133,	100576413,
chr14	100588711	100589153	intergenic_lncRNA_354	-	100588711,	100589153,
chr14	24821984	24822428	intergenic_lncRNA_355	-	24821984,	24822428,
chr14	58300434	58301284	intergenic_lncRNA_356	-	58300434,	58301284,
chr14	100665426	100665699	intergenic_lncRNA_357	-	100665426,	100665699,
chr14	100681410	100681970	intergenic_lncRNA_358	-	100681410,	100681970,
chr14	42089644	42090050	intergenic_lncRNA_359	+	42089644,	42090050,
chr14	69637711	69638058	intergenic_lncRNA_360	-	69637711,	69638058,
chr14	86664111	86664457	intergenic_lncRNA_361	-	86664111,	86664457,
chr14	109277117	109277342	intergenic_lncRNA_362	-	109277117,	109277342,
chr14	52863780	52864161	intergenic_lncRNA_363	-	52863780,	52864161,
chr15	12134028	12134287	intergenic_lncRNA_364	-	12134028,	12134287,
chr15	36876203	36876573	intergenic_lncRNA_365	+	36876203,	36876573,
chr15	73255842	73256139	intergenic_lncRNA_366	-	73255842,	73256139,
chr15	76750310	76750521	intergenic_lncRNA_367	+	76750310,	76750521,
chr15	80550546	80550765	intergenic_lncRNA_368	+	80550546,	80550765,
chr15	85303273	85303535	intergenic_lncRNA_369	-	85303273,	85303535,
chr15	85304967	85305198	intergenic_lncRNA_370	-	85304967,	85305198,
chr15	85494443	85494665	intergenic_lncRNA_371	+	85494443,	85494665,
chr15	98772521	98772760	intergenic_lncRNA_372	+	98772521,	98772760,
chr15	98827257	98827796	intergenic_lncRNA_373	-	98827257,	98827796,
chr15	102930737	102931002	intergenic_lncRNA_374	-	102930737,	102931002,
chr15	82794111	82794368	intergenic_lncRNA_375	-	82794111,	82794368,
chr15	85514456	85514798	intergenic_lncRNA_376	+	85514456,	85514798,
chr15	102928613	102928881	intergenic_lncRNA_377	-	102928613,	102928881,
chr15	92832204	92832467	intergenic_lncRNA_378	+	92832204,	92832467,
chr15	68926258	68926594	intergenic_lncRNA_379	-	68926258,	68926594,
chr15	89275159	89275452	intergenic_lncRNA_380	+	89275159,	89275452,
chr15	102927175	102927429	intergenic_lncRNA_381	-	102927175,	102927429,
chr16	40537263	40537510	intergenic_lncRNA_382	+	40537263,	40537510,
chr16	40686011	40686225	intergenic_lncRNA_383	+	40686011,	40686225,
chr16	40795727	40795976	intergenic_lncRNA_384	+	40795727,	40795976,
chr16	39988971	39989336	intergenic_lncRNA_385	+	39988971,	39989336,
chr16	39990886	39992622	intergenic_lncRNA_386	+	39990886,	39992622,
chr16	40006777	40007000	intergenic_lncRNA_387	+	40006777,	40007000,
chr16	40039567	40039853	intergenic_lncRNA_388	+	40039567,	40039853,
chr16	40068032	40068240	intergenic_lncRNA_389	+	40068032,	40068240,
chr16	40156221	40156492	intergenic_lncRNA_390	+	40156221,	40156492,
chr16	40285972	40286273	intergenic_lncRNA_391	+	40285972,	40286273,
chr16	40557095	40557366	intergenic_lncRNA_392	+	40557095,	40557366,
chr16	41291029	41291461	intergenic_lncRNA_393	+	41291029,	41291461,
chr16	41460609	41460856	intergenic_lncRNA_394	+	41460609,	41460856,
chr16	87501149	87501397	intergenic_lncRNA_395	+	87501149,	87501397,
chr16	72380649	72380894	intergenic_lncRNA_396	+	72380649,	72380894,
chr16	3631544	3631801	intergenic_lncRNA_397	-	3631544,	3631801,
chr16	72433348	72433773	intergenic_lncRNA_398	+	72433348,	72433773,
chr16	6562892	6563138	intergenic_lncRNA_399	+	6562892,	6563138,
chr16	41303035	41303269	intergenic_lncRNA_400	+	41303035,	41303269,
chr16	72381050	72381320	intergenic_lncRNA_401	+	72381050,	72381320,
chr16	72427625	72427968	intergenic_lncRNA_402	+	72427625,	72427968,
chr16	6537744	6538166	intergenic_lncRNA_403	+	6537744,	6538166,
chr16	40034746	40035098	intergenic_lncRNA_404	+	40034746,	40035098,
chr16	3351356	3351706	intergenic_lncRNA_405	-	3351356,	3351706,
chr16	4881942	4882148	intergenic_lncRNA_406	+	4881942,	4882148,
chr16	28640147	28640556	intergenic_lncRNA_407	-	28640147,	28640556,
chr16	41423103	41423479	intergenic_lncRNA_408	-	41423103,	41423479,
chr16	41429334	41429613	intergenic_lncRNA_409	-	41429334,	41429613,
chr16	6493104	6493355	intergenic_lncRNA_410	+	6493104,	6493355,
chr16	6564844	6565257	intergenic_lncRNA_411	+	6564844,	6565257,
chr17	3216984	3217767	intergenic_lncRNA_412	+	3216984,	3217767,
chr17	3224361	3225048	intergenic_lncRNA_413	+	3224361,	3225048,
chr17	3226843	3227563	intergenic_lncRNA_414	+	3226843,	3227563,
chr17	33025264	33025688	intergenic_lncRNA_415	-	33025264,	33025688,
chr17	31880432	31880881	intergenic_lncRNA_416	-	31880432,	31880881,
chr17	43284260	43284812	intergenic_lncRNA_417	-	43284260,	43284812,
chr17	32945667	32945879	intergenic_lncRNA_418	-	32945667,	32945879,
chr17	21823520	21823933	intergenic_lncRNA_419	+	21823520,	21823933,
chr17	17448988	17449414	intergenic_lncRNA_420	+	17448988,	17449414,
chr17	32941984	32942284	intergenic_lncRNA_421	-	32941984,	32942284,
chr17	3294295	3294642	intergenic_lncRNA_422	+	3294295,	3294642,
chr17	48932571	48932866	intergenic_lncRNA_423	-	48932571,	48932866,
chr18	5166584	5166796	intergenic_lncRNA_424	-	5166584,	5166796,
chr19	40980598	40980800	intergenic_lncRNA_425	+	40980598,	40980800,
chr19	39003028	39003255	intergenic_lncRNA_426	+	39003028,	39003255,
chr19	55701852	55702219	intergenic_lncRNA_427	+	55701852,	55702219,
chr19	4629456	4629859	intergenic_lncRNA_428	+	4629456,	4629859,
chr2	119707533	119707741	intergenic_lncRNA_429	+	119707533,	119707741,
chr2	13978398	13978960	intergenic_lncRNA_430	+	13978398,	13978960,
chr2	157393120	157393598	intergenic_lncRNA_431	+	157393120,	157393598,
chr2	76463882	76464229	intergenic_lncRNA_432	-	76463882,	76464229,
chr2	17971986	17972473	intergenic_lncRNA_433	-	17971986,	17972473,
chr2	156226121	156226573	intergenic_lncRNA_434	+	156226121,	156226573,
chr2	181651991	181652237	intergenic_lncRNA_435	+	181651991,	181652237,
chr2	181025797	181026335	intergenic_lncRNA_436	+	181025797,	181026335,
chr2	7007638	7008045	intergenic_lncRNA_437	-	7007638,	7008045,
chr2	156593539	156593789	intergenic_lncRNA_438	+	156593539,	156593789,
chr3	30123807	30124054	intergenic_lncRNA_439	-	30123807,	30124054,
chr3	30375134	30375534	intergenic_lncRNA_440	-	30375134,	30375534,
chr3	104782690	104782957	intergenic_lncRNA_441	+	104782690,	104782957,
chr3	104798864	104799260	intergenic_lncRNA_442	+	104798864,	104799260,
chr3	95470058	95470314	intergenic_lncRNA_443	+	95470058,	95470314,
chr3	13573847	13574059	intergenic_lncRNA_444	+	13573847,	13574059,
chr3	17219985	17220449	intergenic_lncRNA_445	+	17219985,	17220449,
chr3	73026030	73026352	intergenic_lncRNA_446	+	73026030,	73026352,
chr3	17229183	17229405	intergenic_lncRNA_447	-	17229183,	17229405,
chr3	116608687	116609273	intergenic_lncRNA_448	+	116608687,	116609273,
chr3	73321944	73322152	intergenic_lncRNA_449	+	73321944,	73322152,
chr3	95473928	95474199	intergenic_lncRNA_450	-	95473928,	95474199,
chr3	148954553	148954860	intergenic_lncRNA_451	-	148954553,	148954860,
chr3	5164202	5164515	intergenic_lncRNA_452	+	5164202,	5164515,
chr3	102193636	102193934	intergenic_lncRNA_453	+	102193636,	102193934,
chr4	62165718	62165979	intergenic_lncRNA_454	+	62165718,	62165979,
chr5	105249279	105249856	intergenic_lncRNA_455	-	105249279,	105249856,
chr5	110302903	110303116	intergenic_lncRNA_456	-	110302903,	110303116,
chr5	73658513	73658923	intergenic_lncRNA_457	+	73658513,	73658923,
chr5	33764659	33764871	intergenic_lncRNA_458	+	33764659,	33764871,
chr5	34162561	34162815	intergenic_lncRNA_459	-	34162561,	34162815,
chr5	120870599	120870814	intergenic_lncRNA_460	-	120870599,	120870814,
chr5	136675823	136676103	intergenic_lncRNA_461	-	136675823,	136676103,
chr5	143585043	143585529	intergenic_lncRNA_462	+	143585043,	143585529,
chr5	23214052	23214328	intergenic_lncRNA_463	-	23214052,	23214328,
chr5	52779725	52780101	intergenic_lncRNA_464	-	52779725,	52780101,
chr5	138165884	138166346	intergenic_lncRNA_465	+	138165884,	138166346,
chr5	21851541	21851940	intergenic_lncRNA_466	-	21851541,	21851940,
chr5	67520691	67521041	intergenic_lncRNA_467	+	67520691,	67521041,
chr5	100175900	100176160	intergenic_lncRNA_468	-	100175900,	100176160,
chr5	13603614	13603842	intergenic_lncRNA_469	+	13603614,	13603842,
chr6	52065421	52065708	intergenic_lncRNA_470	+	52065421,	52065708,
chr6	48463177	48463416	intergenic_lncRNA_471	+	48463177,	48463416,
chr6	134883334	134883559	intergenic_lncRNA_472	+	134883334,	134883559,
chr6	47707708	47708180	intergenic_lncRNA_473	+	47707708,	47708180,
chr6	6300664	6300874	intergenic_lncRNA_474	-	6300664,	6300874,
chr6	47720199	47720578	intergenic_lncRNA_475	+	47720199,	47720578,
chr6	124757607	124757895	intergenic_lncRNA_476	+	124757607,	124757895,
chr6	85986659	85986986	intergenic_lncRNA_477	+	85986659,	85986986,
chr6	39826551	39826989	intergenic_lncRNA_478	+	39826551,	39826989,
chr6	39827074	39827430	intergenic_lncRNA_479	+	39827074,	39827430,
chr6	85996691	85996944	intergenic_lncRNA_480	+	85996691,	85996944,
chr6	85997396	85997757	intergenic_lncRNA_481	+	85997396,	85997757,
chr6	121079880	121080172	intergenic_lncRNA_482	-	121079880,	121080172,
chr7	88481717	88482413	intergenic_lncRNA_483	+	88481717,	88482413,
chr7	28677176	28677487	intergenic_lncRNA_484	-	28677176,	28677487,
chr7	80693427	80694125	intergenic_lncRNA_485	+	80693427,	80694125,
chr7	69175472	69175810	intergenic_lncRNA_486	-	69175472,	69175810,
chr7	130182392	130182615	intergenic_lncRNA_487	+	130182392,	130182615,
chr7	52526154	52526523	intergenic_lncRNA_488	+	52526154,	52526523,
chr7	77679796	77680234	intergenic_lncRNA_489	-	77679796,	77680234,
chr7	87491790	87492116	intergenic_lncRNA_490	+	87491790,	87492116,
chr7	46735119	46735429	intergenic_lncRNA_491	+	46735119,	46735429,
chr7	57120381	57120692	intergenic_lncRNA_492	+	57120381,	57120692,
chr7	67942236	67942476	intergenic_lncRNA_493	-	67942236,	67942476,
chr7	69603873	69604150	intergenic_lncRNA_494	-	69603873,	69604150,
chr7	77642828	77643122	intergenic_lncRNA_495	+	77642828,	77643122,
chr7	81700544	81700905	intergenic_lncRNA_496	+	81700544,	81700905,
chr7	86689400	86689723	intergenic_lncRNA_497	+	86689400,	86689723,
chr7	88136186	88136480	intergenic_lncRNA_498	+	88136186,	88136480,
chr7	68175088	68175314	intergenic_lncRNA_499	-	68175088,	68175314,
chr7	69510808	69511270	intergenic_lncRNA_500	-	69510808,	69511270,
chr7	49734967	49735219	intergenic_lncRNA_501	-	49734967,	49735219,
chr8	48764426	48764699	intergenic_lncRNA_502	+	48764426,	48764699,
chr8	71742069	71742275	intergenic_lncRNA_503	-	71742069,	71742275,
chr8	109932256	109932521	intergenic_lncRNA_504	-	109932256,	109932521,
chr8	10921727	10922214	intergenic_lncRNA_505	-	10921727,	10922214,
chr8	98199540	98199908	intergenic_lncRNA_506	+	98199540,	98199908,
chr8	23336646	23336961	intergenic_lncRNA_507	+	23336646,	23336961,
chr8	51467308	51467550	intergenic_lncRNA_508	+	51467308,	51467550,
chr8	51472704	51473060	intergenic_lncRNA_509	+	51472704,	51473060,
chr8	91585134	91585421	intergenic_lncRNA_510	+	91585134,	91585421,
chr8	49922147	49922443	intergenic_lncRNA_511	-	49922147,	49922443,
chr8	74748359	74748801	intergenic_lncRNA_512	+	74748359,	74748801,
chr8	4616429	4616638	intergenic_lncRNA_513	+	4616429,	4616638,
chr9	13323466	13328885	intergenic_lncRNA_514	+	13323466,	13328885,
chr9	48053252	48053718	intergenic_lncRNA_515	+	48053252,	48053718,
chr9	48115007	48115412	intergenic_lncRNA_516	+	48115007,	48115412,
chr9	79997977	79998437	intergenic_lncRNA_517	-	79997977,	79998437,
chr9	89170244	89170771	intergenic_lncRNA_518	+	89170244,	89170771,
chr9	89166227	89166507	intergenic_lncRNA_519	+	89166227,	89166507,
chr12	110741314	110742954	intergenic_lncRNA_518	+	110741314,	110742954,
chr12	111554138	111554684	intergenic_lncRNA_519	+	111554138,	111554684,
chrX	132512684	132513079	intergenic_lncRNA_522	+	132512684,	132513079,
chr4	141095035	141095689	intergenic_lncRNA_523	+	141095035,	141095689,
chr1	3642262	3642573	intronic_lncRNA_1	-	3642262,	3642573,
chr1	3645721	3646005	intronic_lncRNA_2	-	3645721,	3646005,
chr1	4484198	4485071	intronic_lncRNA_3	-	4484198,4484784,	4484734,4485071,
chr1	4771471	4771992	intronic_lncRNA_4	-	4771471,	4771992,
chr1	5009742	5010105	intronic_lncRNA_5	-	5009742,	5010105,
chr1	5073368	5073710	intronic_lncRNA_6	+	5073368,	5073710,
chr1	6200530	6201605	intronic_lncRNA_7	-	6200530,	6201605,
chr1	6202077	6202507	intronic_lncRNA_8	+	6202077,	6202507,
chr1	6250276	6250662	intronic_lncRNA_9	+	6250276,	6250662,
chr1	7138155	7139245	intronic_lncRNA_10	+	7138155,	7139245,
chr1	7140844	7141076	intronic_lncRNA_11	-	7140844,	7141076,
chr1	7141757	7143839	intronic_lncRNA_12	+	7141757,	7143839,
chr1	7144831	7146379	intronic_lncRNA_13	+	7144831,	7146379,
chr1	7146773	7147399	intronic_lncRNA_14	+	7146773,7147115,	7147043,7147399,
chr1	7148075	7150161	intronic_lncRNA_15	-	7148075,7149297,	7149189,7150161,
chr1	9607473	9607767	intronic_lncRNA_16	+	9607473,	9607767,
chr1	10050623	10077408	intronic_lncRNA_17	+	10050623,10052717,10053693,10059518,10061231,10062525,10063434,10064283,10066055,10074473,10077176,	10052349,10053637,10054373,10059912,10061626,10063033,10063664,10064512,10066510,10074824,10077408,
chr1	10095872	10096434	intronic_lncRNA_18	+	10095872,	10096434,
chr1	10138223	10138560	intronic_lncRNA_19	-	10138223,	10138560,
chr1	13157314	13159569	intronic_lncRNA_20	+	13157314,13158265,13159002,	13158183,13158609,13159569,
chr1	13160147	13162096	intronic_lncRNA_21	-	13160147,13160754,13161322,13161634,	13160382,13160980,13161620,13162096,
chr1	13163426	13164155	intronic_lncRNA_22	-	13163426,13163838,	13163786,13164155,
chr1	13617028	13617425	intronic_lncRNA_23	-	13617028,	13617425,
chr1	15387076	15388124	intronic_lncRNA_24	+	15387076,	15388124,
chr1	15405152	15405586	intronic_lncRNA_25	+	15405152,	15405586,
chr1	15436636	15437087	intronic_lncRNA_26	+	15436636,	15437087,
chr1	15438256	15442072	intronic_lncRNA_27	+	15438256,15441388,	15439086,15442072,
chr1	15442410	15442830	intronic_lncRNA_28	+	15442410,	15442830,
chr1	15527033	15529744	intronic_lncRNA_29	-	15527033,	15529744,
chr1	15564060	15564514	intronic_lncRNA_30	+	15564060,	15564514,
chr1	15807376	15808859	intronic_lncRNA_31	+	15807376,15808264,15808512,	15807968,15808488,15808859,
chr1	17149008	17149614	intronic_lncRNA_32	+	17149008,17149319,	17149253,17149614,
chr1	21217937	21218273	intronic_lncRNA_33	+	21217937,	21218273,
chr1	21218604	21218806	intronic_lncRNA_34	+	21218604,	21218806,
chr1	21502511	21502814	intronic_lncRNA_35	-	21502511,	21502814,
chr1	21804463	21812167	intronic_lncRNA_36	-	21804463,21807080,21809229,21809844,21811555,	21804690,21807719,21809807,21810501,21812167,
chr1	21817456	21817861	intronic_lncRNA_37	-	21817456,	21817861,
chr1	21847423	21847814	intronic_lncRNA_38	-	21847423,	21847814,
chr1	21849806	21850855	intronic_lncRNA_39	+	21849806,21850460,	21850043,21850855,
chr1	21852259	21852563	intronic_lncRNA_40	-	21852259,	21852563,
chr1	21931189	21932040	intronic_lncRNA_41	+	21931189,	21932040,
chr1	21949989	21950817	intronic_lncRNA_42	+	21949989,	21950817,
chr1	22798793	22799394	intronic_lncRNA_43	-	22798793,	22799394,
chr1	23838936	23851255	intronic_lncRNA_44	+	23838936,23841737,23845477,23847282,23849170,23850436,	23840234,23842234,23846618,23847971,23849571,23851255,
chr1	24023262	24023643	intronic_lncRNA_45	-	24023262,	24023643,
chr1	24054387	24058139	intronic_lncRNA_46	-	24054387,24054718,24055883,24057555,	24054686,24055195,24056132,24058139,
chr1	24817760	24818011	intronic_lncRNA_47	+	24817760,	24818011,
chr1	25789638	25791352	intronic_lncRNA_48	-	25789638,25790508,	25790290,25791352,
chr1	25836942	25837222	intronic_lncRNA_49	-	25836942,	25837222,
chr1	25854668	25855089	intronic_lncRNA_50	-	25854668,	25855089,
chr1	25863711	25864065	intronic_lncRNA_51	-	25863711,	25864065,
chr1	32572211	32574836	intronic_lncRNA_52	-	32572211,	32574836,
chr1	32597570	32599295	intronic_lncRNA_53	-	32597570,32598092,32598859,	32597790,32598511,32599295,
chr1	33819233	33819785	intronic_lncRNA_54	-	33819233,	33819785,
chr1	33844419	33846640	intronic_lncRNA_55	-	33844419,33845016,33845799,33846430,	33844932,33845253,33846353,33846640,
chr1	33847669	33847947	intronic_lncRNA_56	-	33847669,	33847947,
chr1	33849029	33857885	intronic_lncRNA_57	-	33849029,33851865,33853171,33857465,	33851801,33853021,33857425,33857885,
chr1	34353622	34356564	intronic_lncRNA_58	+	34353622,34354860,34355270,34355956,34356358,	34354701,34355174,34355622,34356237,34356564,
chr1	34850827	34851115	intronic_lncRNA_59	-	34850827,	34851115,
chr1	36402909	36403230	intronic_lncRNA_60	-	36402909,	36403230,
chr1	36424880	36425539	intronic_lncRNA_61	-	36424880,	36425539,
chr1	36484523	36484913	intronic_lncRNA_62	+	36484523,	36484913,
chr1	36487203	36488243	intronic_lncRNA_63	-	36487203,36487608,	36487512,36488243,
chr1	36488845	36491257	intronic_lncRNA_64	-	36488845,36490943,	36489332,36491257,
chr1	36580999	36581996	intronic_lncRNA_65	+	36580999,	36581996,
chr1	36591562	36592139	intronic_lncRNA_66	-	36591562,	36592139,
chr1	36607696	36608166	intronic_lncRNA_67	-	36607696,	36608166,
chr1	36612001	36612230	intronic_lncRNA_68	-	36612001,	36612230,
chr1	36615859	36617225	intronic_lncRNA_69	+	36615859,36616338,	36616274,36617225,
chr1	37458764	37464849	intronic_lncRNA_70	+	37458764,37461497,37462657,37464522,	37459066,37461843,37463097,37464849,
chr1	37494734	37495519	intronic_lncRNA_71	+	37494734,37495059,	37495049,37495519,
chr1	37922822	37923055	intronic_lncRNA_72	+	37922822,	37923055,
chr1	37939104	37939390	intronic_lncRNA_73	-	37939104,	37939390,
chr1	38129644	38129998	intronic_lncRNA_74	-	38129644,	38129998,
chr1	38132058	38133945	intronic_lncRNA_75	-	38132058,38133512,	38132567,38133945,
chr1	38134971	38135582	intronic_lncRNA_76	+	38134971,	38135582,
chr1	38138006	38138227	intronic_lncRNA_77	-	38138006,	38138227,
chr1	38683087	38683933	intronic_lncRNA_78	-	38683087,	38683933,
chr1	39438807	39441562	intronic_lncRNA_79	-	39438807,39440399,	39439075,39441562,
chr1	39604980	39605441	intronic_lncRNA_80	-	39604980,	39605441,
chr1	40064418	40064827	intronic_lncRNA_81	+	40064418,	40064827,
chr1	40070198	40070623	intronic_lncRNA_82	+	40070198,	40070623,
chr1	42708380	42709458	intronic_lncRNA_83	+	42708380,	42709458,
chr1	42715854	42719908	intronic_lncRNA_84	+	42715854,	42719908,
chr1	43106711	43108375	intronic_lncRNA_85	-	43106711,	43108375,
chr1	43152223	43152677	intronic_lncRNA_86	-	43152223,	43152677,
chr1	43187376	43187584	intronic_lncRNA_87	+	43187376,	43187584,
chr1	43613829	43614307	intronic_lncRNA_88	+	43613829,	43614307,
chr1	43615071	43615548	intronic_lncRNA_89	+	43615071,	43615548,
chr1	43618727	43619373	intronic_lncRNA_90	-	43618727,	43619373,
chr1	43619922	43625902	intronic_lncRNA_91	+	43619922,43620398,43622005,43623026,43624070,	43620363,43621320,43622831,43623994,43625902,
chr1	43814973	43816343	intronic_lncRNA_92	-	43814973,43815600,	43815525,43816343,
chr1	43816469	43817365	intronic_lncRNA_93	-	43816469,43817020,	43816744,43817365,
chr1	44160733	44161489	intronic_lncRNA_94	+	44160733,	44161489,
chr1	44162821	44163024	intronic_lncRNA_95	-	44162821,	44163024,
chr1	44206972	44207183	intronic_lncRNA_96	-	44206972,	44207183,
chr1	44213042	44213701	intronic_lncRNA_97	+	44213042,	44213701,
chr1	46908910	46909128	intronic_lncRNA_98	+	46908910,	46909128,
chr1	50981039	50981250	intronic_lncRNA_99	+	50981039,	50981250,
chr1	51823904	51824117	intronic_lncRNA_100	-	51823904,	51824117,
chr1	51824757	51825231	intronic_lncRNA_101	-	51824757,	51825231,
chr1	52225428	52263331	intronic_lncRNA_102	-	52225428,52262287,52262764,52263108,	52225732,52262757,52263024,52263331,
chr1	52258359	52259396	intronic_lncRNA_103	-	52258359,	52259396,
chr1	52698099	52702064	intronic_lncRNA_104	+	52698099,52701051,52701452,	52698652,52701337,52702064,
chr1	52715748	52716701	intronic_lncRNA_105	-	52715748,52716071,	52716039,52716701,
chr1	53372871	53375819	intronic_lncRNA_106	+	53372871,53373403,53375142,53375572,	53373102,53374342,53375499,53375819,
chr1	53381990	53382349	intronic_lncRNA_107	-	53381990,	53382349,
chr1	54455069	54455391	intronic_lncRNA_108	-	54455069,	54455391,
chr1	54705275	54708022	intronic_lncRNA_109	-	54705275,54707614,	54706748,54708022,
chr1	57448783	57449131	intronic_lncRNA_110	+	57448783,	57449131,
chr1	57470864	57471294	intronic_lncRNA_111	+	57470864,	57471294,
chr1	58472652	58472900	intronic_lncRNA_112	+	58472652,	58472900,
chr1	58472999	58473818	intronic_lncRNA_113	-	58472999,	58473818,
chr1	58500588	58500970	intronic_lncRNA_114	-	58500588,	58500970,
chr1	58508062	58508525	intronic_lncRNA_115	+	58508062,	58508525,
chr1	58516299	58516892	intronic_lncRNA_116	+	58516299,	58516892,
chr1	58521872	58522502	intronic_lncRNA_117	+	58521872,	58522502,
chr1	58562137	58565283	intronic_lncRNA_118	+	58562137,58563302,58563936,58565040,	58562545,58563814,58564197,58565283,
chr1	59176100	59176357	intronic_lncRNA_119	-	59176100,	59176357,
chr1	59219096	59219547	intronic_lncRNA_120	-	59219096,	59219547,
chr1	59226858	59227258	intronic_lncRNA_121	-	59226858,	59227258,
chr1	59581182	59581630	intronic_lncRNA_122	+	59581182,	59581630,
chr1	60572301	60572830	intronic_lncRNA_123	-	60572301,	60572830,
chr1	62853494	62853741	intronic_lncRNA_124	-	62853494,	62853741,
chr1	63161778	63179364	intronic_lncRNA_125	+	63161778,63162735,63164490,63166037,63166871,63168040,63170018,63172874,63173590,63174087,63174923,63177071,63177370,63179025,	63162039,63164247,63165758,63166531,63167859,63169221,63170601,63173188,63173861,63174821,63176486,63177328,63177913,63179364,
chr1	63186306	63187054	intronic_lncRNA_126	+	63186306,	63187054,
chr1	63200240	63202495	intronic_lncRNA_127	-	63200240,63201226,63202237,	63200446,63201923,63202495,
chr1	63620010	63638548	intronic_lncRNA_128	+	63620010,63626232,63626630,63627920,63629899,63631499,63632543,63633092,63633683,63634718,63635627,63636880,63637565,63638170,	63621275,63626577,63627363,63629207,63631011,63631930,63632794,63633621,63634692,63635510,63636827,63637352,63638053,63638548,
chr1	63623220	63626103	intronic_lncRNA_129	+	63623220,63624588,63625211,	63623933,63624807,63626103,
chr1	66738147	66738563	intronic_lncRNA_130	+	66738147,	66738563,
chr1	66771547	66772032	intronic_lncRNA_131	+	66771547,	66772032,
chr1	66775583	66782046	intronic_lncRNA_132	+	66775583,66776521,66778682,66780006,66781648,	66776169,66777906,66779148,66780520,66782046,
chr1	66793938	66794726	intronic_lncRNA_133	+	66793938,	66794726,
chr1	66801058	66801427	intronic_lncRNA_134	+	66801058,	66801427,
chr1	66805639	66808379	intronic_lncRNA_135	-	66805639,66807269,	66806190,66808379,
chr1	66810030	66817166	intronic_lncRNA_136	-	66810030,66813853,66816559,	66811220,66814243,66817166,
chr1	66844006	66846904	intronic_lncRNA_137	-	66844006,66846022,66846634,	66844452,66846366,66846904,
chr1	66856410	66863492	intronic_lncRNA_138	+	66856410,66862445,	66856773,66863492,
chr1	68901977	68902188	intronic_lncRNA_139	-	68901977,	68902188,
chr1	69010386	69011574	intronic_lncRNA_140	+	69010386,69011289,	69011230,69011574,
chr1	69012213	69012844	intronic_lncRNA_141	-	69012213,	69012844,
chr1	69015016	69016465	intronic_lncRNA_142	-	69015016,69015746,	69015244,69016465,
chr1	69045482	69045716	intronic_lncRNA_143	-	69045482,	69045716,
chr1	69048112	69048701	intronic_lncRNA_144	-	69048112,	69048701,
chr1	69079747	69080374	intronic_lncRNA_145	-	69079747,	69080374,
chr1	69080501	69081146	intronic_lncRNA_146	-	69080501,	69081146,
chr1	69091838	69092205	intronic_lncRNA_147	+	69091838,	69092205,
chr1	69092985	69093375	intronic_lncRNA_148	-	69092985,	69093375,
chr1	69111952	69112653	intronic_lncRNA_149	-	69111952,	69112653,
chr1	69134312	69134877	intronic_lncRNA_150	+	69134312,	69134877,
chr1	69135046	69135516	intronic_lncRNA_151	+	69135046,	69135516,
chr1	69136930	69137299	intronic_lncRNA_152	+	69136930,	69137299,
chr1	69731699	69731912	intronic_lncRNA_153	-	69731699,	69731912,
chr1	72292033	72298688	intronic_lncRNA_154	-	72292033,72298335,	72293171,72298688,
chr1	72301348	72303883	intronic_lncRNA_155	+	72301348,72302704,72303368,	72302306,72303199,72303883,
chr1	74572740	74573064	intronic_lncRNA_156	+	74572740,	74573064,
chr1	74596824	74597304	intronic_lncRNA_157	-	74596824,	74597304,
chr1	74635335	74656289	intronic_lncRNA_158	+	74635335,74655931,	74635983,74656289,
chr1	74719599	74739459	intronic_lncRNA_159	+	74719599,74725163,74727051,74736695,74737736,	74719826,74725422,74727661,74737097,74739459,
chr1	74722310	74723016	intronic_lncRNA_160	+	74722310,	74723016,
chr1	74740113	74741493	intronic_lncRNA_161	-	74740113,	74741493,
chr1	75134461	75135433	intronic_lncRNA_162	-	75134461,75134969,	75134887,75135433,
chr1	75138264	75138627	intronic_lncRNA_163	-	75138264,	75138627,
chr1	75201911	75202825	intronic_lncRNA_164	-	75201911,	75202825,
chr1	75258949	75260578	intronic_lncRNA_165	-	75258949,	75260578,
chr1	75437130	75437648	intronic_lncRNA_166	+	75437130,	75437648,
chr1	75496895	75497546	intronic_lncRNA_167	-	75496895,	75497546,
chr1	75504119	75505064	intronic_lncRNA_168	+	75504119,75504796,	75504418,75505064,
chr1	78417495	78417746	intronic_lncRNA_169	+	78417495,	78417746,
chr1	78461705	78462016	intronic_lncRNA_170	+	78461705,	78462016,
chr1	78664416	78666883	intronic_lncRNA_171	+	78664416,78664960,78665774,	78664820,78665713,78666883,
chr1	82875788	82876047	intronic_lncRNA_172	+	82875788,	82876047,
chr1	83260412	83261601	intronic_lncRNA_173	-	83260412,83261060,	83260864,83261601,
chr1	84838026	84844389	intronic_lncRNA_174	+	84838026,84839481,84840588,	84838420,84840463,84844389,
chr1	84904226	84904616	intronic_lncRNA_175	-	84904226,	84904616,
chr1	84908220	84908568	intronic_lncRNA_176	-	84908220,	84908568,
chr1	87838806	87840535	intronic_lncRNA_177	-	87838806,87840051,	87839020,87840535,
chr1	88156719	88157655	intronic_lncRNA_178	+	88156719,	88157655,
chr1	88255157	88255584	intronic_lncRNA_179	-	88255157,	88255584,
chr1	89280727	89281712	intronic_lncRNA_180	-	89280727,	89281712,
chr1	89340882	89341212	intronic_lncRNA_181	-	89340882,	89341212,
chr1	89812243	89812556	intronic_lncRNA_182	+	89812243,	89812556,
chr1	89847354	89848215	intronic_lncRNA_183	+	89847354,	89848215,
chr1	89849068	89850685	intronic_lncRNA_184	-	89849068,89850416,	89850268,89850685,
chr1	90167039	90167391	intronic_lncRNA_185	-	90167039,	90167391,
chr1	90167980	90168852	intronic_lncRNA_186	-	90167980,90168636,	90168296,90168852,
chr1	92973766	93006869	intronic_lncRNA_187	+	92973766,93005878,93006607,	92974055,93006264,93006869,
chr1	93289941	93290174	intronic_lncRNA_188	-	93289941,	93290174,
chr1	93310022	93310237	intronic_lncRNA_189	-	93310022,	93310237,
chr1	93329487	93329783	intronic_lncRNA_190	-	93329487,	93329783,
chr1	93831476	93832716	intronic_lncRNA_191	-	93831476,93832288,	93831991,93832716,
chr1	93850093	93850793	intronic_lncRNA_192	-	93850093,	93850793,
chr1	94368936	94369156	intronic_lncRNA_193	-	94368936,	94369156,
chr1	94745774	94752269	intronic_lncRNA_194	+	94745774,94746354,94747078,94748879,94749640,94751936,	94746271,94746654,94748804,94749591,94749915,94752269,
chr1	94808634	94815440	intronic_lncRNA_195	+	94808634,94809257,94809722,94810066,94810587,94811120,94812565,94814721,	94808906,94809642,94809982,94810332,94810928,94811470,94812927,94815440,
chr1	94837936	94838459	intronic_lncRNA_196	-	94837936,	94838459,
chr1	95431009	95431508	intronic_lncRNA_197	+	95431009,	95431508,
chr1	95477895	95489975	intronic_lncRNA_198	+	95477895,95479576,95482458,	95478736,95480241,95489975,
chr1	95582566	95582988	intronic_lncRNA_199	+	95582566,	95582988,
chr1	95674538	95674858	intronic_lncRNA_200	+	95674538,	95674858,
chr1	95683937	95684214	intronic_lncRNA_201	+	95683937,	95684214,
chr1	95696000	95696581	intronic_lncRNA_202	-	95696000,	95696581,
chr1	99610144	99611465	intronic_lncRNA_203	-	99610144,99610591,	99610460,99611465,
chr1	99614600	99615768	intronic_lncRNA_204	-	99614600,	99615768,
chr1	99720417	99720625	intronic_lncRNA_205	+	99720417,	99720625,
chr1	107477590	107477793	intronic_lncRNA_206	-	107477590,	107477793,
chr1	107588253	107588472	intronic_lncRNA_207	+	107588253,	107588472,
chr1	107634492	107634793	intronic_lncRNA_208	+	107634492,	107634793,
chr1	107643352	107643598	intronic_lncRNA_209	+	107643352,	107643598,
chr1	107925584	107926318	intronic_lncRNA_210	+	107925584,107926110,	107925982,107926318,
chr1	108624734	108627054	intronic_lncRNA_211	-	108624734,108626816,	108625706,108627054,
chr1	111891867	111895364	intronic_lncRNA_212	+	111891867,111893120,111894639,111895050,	111892271,111893601,111894953,111895364,
chr1	120434467	120434793	intronic_lncRNA_213	-	120434467,	120434793,
chr1	120435403	120435659	intronic_lncRNA_214	-	120435403,	120435659,
chr1	120443757	120443981	intronic_lncRNA_215	-	120443757,	120443981,
chr1	121919133	121919423	intronic_lncRNA_216	+	121919133,	121919423,
chr1	123224673	123229037	intronic_lncRNA_217	+	123224673,123226907,123227731,123228555,	123225202,123227721,123228429,123229037,
chr1	127458367	127458828	intronic_lncRNA_218	+	127458367,	127458828,
chr1	127764465	127766066	intronic_lncRNA_219	-	127764465,127765085,	127764770,127766066,
chr1	127808984	127809425	intronic_lncRNA_220	-	127808984,	127809425,
chr1	129695239	129695551	intronic_lncRNA_221	+	129695239,	129695551,
chr1	129835750	129837829	intronic_lncRNA_222	+	129835750,129836190,129836978,129837445,	129836145,129836924,129837386,129837829,
chr1	129862410	129862668	intronic_lncRNA_223	-	129862410,	129862668,
chr1	130070906	130071149	intronic_lncRNA_224	+	130070906,	130071149,
chr1	130085668	130090036	intronic_lncRNA_225	+	130085668,130086113,130086537,130088538,130089706,	130085992,130086500,130087041,130088859,130090036,
chr1	132370892	132371156	intronic_lncRNA_226	+	132370892,	132371156,
chr1	132588200	132588544	intronic_lncRNA_227	-	132588200,	132588544,
chr1	133060143	133072805	intronic_lncRNA_228	+	133060143,133060705,133061821,133067722,133069560,133071648,133072323,	133060373,133060977,133062234,133068041,133069849,133072214,133072805,
chr1	133189583	133190382	intronic_lncRNA_229	-	133189583,133190024,	133189814,133190382,
chr1	133230525	133230744	intronic_lncRNA_230	+	133230525,	133230744,
chr1	133906385	133906784	intronic_lncRNA_231	+	133906385,	133906784,
chr1	134100387	134100597	intronic_lncRNA_232	+	134100387,	134100597,
chr1	134349028	134359308	intronic_lncRNA_233	+	134349028,134358140,134359099,	134349395,134358614,134359308,
chr1	134394825	134400339	intronic_lncRNA_234	+	134394825,134395637,134396752,134397950,134398382,134398782,134399526,	134395609,134396420,134397497,134398323,134398717,134399505,134400339,
chr1	134472998	134473290	intronic_lncRNA_235	-	134472998,	134473290,
chr1	134474198	134476274	intronic_lncRNA_236	-	134474198,134475113,134475991,	134474842,134475748,134476274,
chr1	134476751	134477532	intronic_lncRNA_237	-	134476751,134477082,	134476970,134477532,
chr1	134482029	134482354	intronic_lncRNA_238	-	134482029,	134482354,
chr1	134494549	134496010	intronic_lncRNA_239	-	134494549,134495458,134495797,	134494771,134495715,134496010,
chr1	134893512	134894952	intronic_lncRNA_240	-	134893512,134894214,134894729,	134894005,134894604,134894952,
chr1	134895948	134897749	intronic_lncRNA_241	-	134895948,134897040,134897429,	134896465,134897413,134897749,
chr1	134901761	134905693	intronic_lncRNA_242	-	134901761,134902528,134903657,134905149,	134902369,134903614,134904500,134905693,
chr1	135163780	135195050	intronic_lncRNA_243	+	135163780,135165338,135173130,135174205,135174581,135193849,135194273,	135164655,135165618,135173694,135174549,135175564,135194161,135195050,
chr1	135271806	135272558	intronic_lncRNA_244	+	135271806,	135272558,
chr1	135280588	135280833	intronic_lncRNA_245	-	135280588,	135280833,
chr1	135604631	135606707	intronic_lncRNA_246	-	135604631,135605784,	135605264,135606707,
chr1	135611234	135611501	intronic_lncRNA_247	-	135611234,	135611501,
chr1	136206734	136207844	intronic_lncRNA_248	-	136206734,136207492,	136206997,136207844,
chr1	136209328	136209663	intronic_lncRNA_249	-	136209328,	136209663,
chr1	136251419	136251658	intronic_lncRNA_250	-	136251419,	136251658,
chr1	136657484	136658470	intronic_lncRNA_251	-	136657484,136657769,	136657724,136658470,
chr1	136869934	136870340	intronic_lncRNA_252	+	136869934,	136870340,
chr1	137165904	137166156	intronic_lncRNA_253	-	137165904,	137166156,
chr1	137169548	137169797	intronic_lncRNA_254	-	137169548,	137169797,
chr1	137171819	137172115	intronic_lncRNA_255	-	137171819,	137172115,
chr1	137271133	137271455	intronic_lncRNA_256	-	137271133,	137271455,
chr1	137351908	137352669	intronic_lncRNA_257	-	137351908,137352317,	137352234,137352669,
chr1	137352747	137353734	intronic_lncRNA_258	-	137352747,137353279,	137353185,137353734,
chr1	137354883	137355198	intronic_lncRNA_259	-	137354883,	137355198,
chr1	142507369	142508282	intronic_lncRNA_260	+	142507369,	142508282,
chr1	145610451	145610717	intronic_lncRNA_261	-	145610451,	145610717,
chr1	145624729	145650199	intronic_lncRNA_262	+	145624729,145626209,145626707,145649991,	145625846,145626613,145628422,145650199,
chr1	152230436	152230841	intronic_lncRNA_263	-	152230436,	152230841,
chr1	152293843	152294175	intronic_lncRNA_264	+	152293843,	152294175,
chr1	153286176	153294903	intronic_lncRNA_265	+	153286176,153292750,153293432,153294510,	153286636,153293336,153294451,153294903,
chr1	155596755	155598283	intronic_lncRNA_266	+	155596755,	155598283,
chr1	155598545	155598753	intronic_lncRNA_267	+	155598545,	155598753,
chr1	155744258	155744991	intronic_lncRNA_268	+	155744258,	155744991,
chr1	156266170	156266406	intronic_lncRNA_269	+	156266170,	156266406,
chr1	157060856	157062015	intronic_lncRNA_270	-	157060856,157061687,	157061155,157062015,
chr1	157639883	157640145	intronic_lncRNA_271	-	157639883,	157640145,
chr1	157856044	157856386	intronic_lncRNA_272	-	157856044,	157856386,
chr1	157857653	157859636	intronic_lncRNA_273	-	157857653,157858597,	157858387,157859636,
chr1	157890172	157892792	intronic_lncRNA_274	-	157890172,157890960,	157890646,157892792,
chr1	158490508	158490810	intronic_lncRNA_275	+	158490508,	158490810,
chr1	160187079	160187419	intronic_lncRNA_276	-	160187079,	160187419,
chr1	162505135	162506728	intronic_lncRNA_277	-	162505135,162505921,	162505497,162506728,
chr1	162837368	162837664	intronic_lncRNA_278	+	162837368,	162837664,
chr1	162851185	162851439	intronic_lncRNA_279	+	162851185,	162851439,
chr1	164121016	164121222	intronic_lncRNA_280	-	164121016,	164121222,
chr1	164526262	164526647	intronic_lncRNA_281	+	164526262,	164526647,
chr1	165845340	165845543	intronic_lncRNA_282	-	165845340,	165845543,
chr1	165872434	165873387	intronic_lncRNA_283	+	165872434,	165873387,
chr1	165883027	165883280	intronic_lncRNA_284	+	165883027,	165883280,
chr1	166205894	166206464	intronic_lncRNA_285	+	166205894,	166206464,
chr1	168228678	168229041	intronic_lncRNA_286	+	168228678,	168229041,
chr1	168232203	168232524	intronic_lncRNA_287	+	168232203,	168232524,
chr1	168905774	168907330	intronic_lncRNA_288	-	168905774,168906862,	168906049,168907330,
chr1	168971258	168971499	intronic_lncRNA_289	+	168971258,	168971499,
chr1	169010105	169012488	intronic_lncRNA_290	+	169010105,169011389,169011944,169012244,	169010306,169011652,169012193,169012488,
chr1	169285939	169286316	intronic_lncRNA_291	+	169285939,	169286316,
chr1	172251026	172252746	intronic_lncRNA_292	-	172251026,	172252746,
chr1	172803291	172803584	intronic_lncRNA_293	-	172803291,	172803584,
chr1	172811394	172811624	intronic_lncRNA_294	+	172811394,	172811624,
chr1	173343308	173344410	intronic_lncRNA_295	+	173343308,173344063,	173343759,173344410,
chr1	173939224	173939455	intronic_lncRNA_296	-	173939224,	173939455,
chr1	174045865	174046169	intronic_lncRNA_297	+	174045865,	174046169,
chr1	174117045	174124685	intronic_lncRNA_298	+	174117045,174124203,	174117480,174124685,
chr1	174243740	174247374	intronic_lncRNA_299	+	174243740,174244302,174244868,174245399,174245797,174246666,	174243987,174244779,174245135,174245724,174246275,174247374,
chr1	174253483	174255338	intronic_lncRNA_300	+	174253483,174254637,	174254264,174255338,
chr1	174417596	174423431	intronic_lncRNA_301	+	174417596,174418250,174419122,174422880,	174417878,174418568,174419424,174423431,
chr1	174426774	174427001	intronic_lncRNA_302	+	174426774,	174427001,
chr1	175276694	175276896	intronic_lncRNA_303	-	175276694,	175276896,
chr1	175383725	175384223	intronic_lncRNA_304	+	175383725,	175384223,
chr1	176989926	176990691	intronic_lncRNA_305	-	176989926,176990322,	176990278,176990691,
chr1	176996373	176996639	intronic_lncRNA_306	-	176996373,	176996639,
chr1	178681216	178681883	intronic_lncRNA_307	-	178681216,	178681883,
chr1	178682817	178683695	intronic_lncRNA_308	-	178682817,178683121,	178683040,178683695,
chr1	178683996	178684243	intronic_lncRNA_309	-	178683996,	178684243,
chr1	178851853	178852276	intronic_lncRNA_310	+	178851853,	178852276,
chr1	178928938	178930614	intronic_lncRNA_311	+	178928938,178929866,	178929450,178930614,
chr1	178946785	178948033	intronic_lncRNA_312	+	178946785,	178948033,
chr1	179700222	179700644	intronic_lncRNA_313	-	179700222,	179700644,
chr1	180249392	180249896	intronic_lncRNA_314	-	180249392,	180249896,
chr1	181227767	181228873	intronic_lncRNA_315	-	181227767,	181228873,
chr1	182160312	182160730	intronic_lncRNA_316	-	182160312,	182160730,
chr1	182736071	182736277	intronic_lncRNA_317	-	182736071,	182736277,
chr1	182736961	182738036	intronic_lncRNA_318	-	182736961,182737402,182737735,	182737272,182737652,182738036,
chr1	183025257	183025677	intronic_lncRNA_319	-	183025257,	183025677,
chr1	183751899	183752791	intronic_lncRNA_320	+	183751899,183752442,	183752371,183752791,
chr1	183754907	183755150	intronic_lncRNA_321	-	183754907,	183755150,
chr1	184249329	184249547	intronic_lncRNA_322	-	184249329,	184249547,
chr1	184808434	184817277	intronic_lncRNA_323	+	184808434,184808909,184811694,184813928,184814726,184815033,184816593,184816841,	184808655,184809272,184812376,184814297,184814930,184816459,184816796,184817277,
chr1	186725072	186725601	intronic_lncRNA_324	-	186725072,	186725601,
chr1	186726023	186728312	intronic_lncRNA_325	-	186726023,186726770,	186726475,186728312,
chr1	186728405	186728938	intronic_lncRNA_326	-	186728405,186728702,	186728620,186728938,
chr1	187074290	187074553	intronic_lncRNA_327	+	187074290,	187074553,
chr1	187102526	187104964	intronic_lncRNA_328	+	187102526,187103873,187104640,	187102958,187104087,187104964,
chr1	187173585	187173809	intronic_lncRNA_329	+	187173585,	187173809,
chr1	187175403	187176056	intronic_lncRNA_330	+	187175403,	187176056,
chr1	188560517	188561425	intronic_lncRNA_331	-	188560517,	188561425,
chr1	188563164	188563426	intronic_lncRNA_332	-	188563164,	188563426,
chr1	189058850	189167631	intronic_lncRNA_333	+	189058850,189059713,189060609,189061317,189167336,	189059423,189060028,189061022,189062550,189167631,
chr1	189475322	189475821	intronic_lncRNA_334	+	189475322,189475591,	189475551,189475821,
chr1	191101126	191101743	intronic_lncRNA_335	-	191101126,	191101743,
chr1	191967695	191967912	intronic_lncRNA_336	-	191967695,	191967912,
chr1	192599018	192600484	intronic_lncRNA_337	-	192599018,192599320,192599889,	192599260,192599708,192600484,
chr1	192758647	192764639	intronic_lncRNA_338	+	192758647,192763315,	192758890,192764639,
chr1	192839913	192843519	intronic_lncRNA_339	-	192839913,192841255,192843302,	192841213,192843147,192843519,
chr1	192846174	192847463	intronic_lncRNA_340	-	192846174,192847057,	192846813,192847463,
chr1	193166216	193166816	intronic_lncRNA_341	+	193166216,	193166816,
chr1	193167554	193168224	intronic_lncRNA_342	-	193167554,	193168224,
chr1	193171378	193172138	intronic_lncRNA_343	+	193171378,	193172138,
chr1	193433954	193434181	intronic_lncRNA_344	+	193433954,	193434181,
chr1	193729517	193730400	intronic_lncRNA_345	-	193729517,193729960,	193729935,193730400,
chr1	193933561	193936772	intronic_lncRNA_346	+	193933561,193936562,	193934931,193936772,
chr1	193944731	193945274	intronic_lncRNA_347	-	193944731,	193945274,
chr1	193962705	193966942	intronic_lncRNA_348	+	193962705,193963628,193964738,193965402,193966703,	193963513,193964629,193965252,193966072,193966942,
chr1	194935643	194935975	intronic_lncRNA_349	+	194935643,	194935975,
chr1	194941285	194941705	intronic_lncRNA_350	-	194941285,	194941705,
chr1	196804725	196859557	intronic_lncRNA_351	+	196804725,196854102,196854946,196857425,196858478,196859206,	196805336,196854449,196855150,196857647,196859021,196859557,
chr1	196868476	196869235	intronic_lncRNA_352	+	196868476,	196869235,
chr10	3486790	3490656	intronic_lncRNA_353	-	3486790,3490428,	3487191,3490656,
chr10	4529589	4531806	intronic_lncRNA_354	+	4529589,4531015,4531459,	4529936,4531320,4531806,
chr10	4530290	4530519	intronic_lncRNA_355	+	4530290,	4530519,
chr10	5936377	5937473	intronic_lncRNA_356	-	5936377,5937082,	5937006,5937473,
chr10	5942679	5942954	intronic_lncRNA_357	+	5942679,	5942954,
chr10	6193459	6193792	intronic_lncRNA_358	+	6193459,	6193792,
chr10	7351032	7352182	intronic_lncRNA_359	+	7351032,	7352182,
chr10	7361476	7361847	intronic_lncRNA_360	+	7361476,	7361847,
chr10	7362659	7363021	intronic_lncRNA_361	+	7362659,	7363021,
chr10	7428532	7429003	intronic_lncRNA_362	-	7428532,	7429003,
chr10	7475249	7475529	intronic_lncRNA_363	-	7475249,	7475529,
chr10	7480086	7480532	intronic_lncRNA_364	+	7480086,	7480532,
chr10	7490643	7491357	intronic_lncRNA_365	-	7490643,	7491357,
chr10	8470442	8470830	intronic_lncRNA_366	-	8470442,	8470830,
chr10	8481854	8482281	intronic_lncRNA_367	-	8481854,	8482281,
chr10	8529432	8529691	intronic_lncRNA_368	-	8529432,	8529691,
chr10	10929464	10930063	intronic_lncRNA_369	+	10929464,	10930063,
chr10	12334712	12334914	intronic_lncRNA_370	-	12334712,	12334914,
chr10	12828752	12829081	intronic_lncRNA_371	-	12828752,	12829081,
chr10	12829431	12829722	intronic_lncRNA_372	+	12829431,	12829722,
chr10	12830748	12830956	intronic_lncRNA_373	+	12830748,	12830956,
chr10	12831080	12831315	intronic_lncRNA_374	+	12831080,	12831315,
chr10	12833357	12835927	intronic_lncRNA_375	+	12833357,12835512,	12833901,12835927,
chr10	13245301	13247239	intronic_lncRNA_376	-	13245301,	13247239,
chr10	13247828	13248297	intronic_lncRNA_377	-	13247828,	13248297,
chr10	13692532	13692957	intronic_lncRNA_378	+	13692532,	13692957,
chr10	13698264	13698564	intronic_lncRNA_379	+	13698264,	13698564,
chr10	13725593	13726599	intronic_lncRNA_380	-	13725593,13726289,	13726157,13726599,
chr10	13728442	13732036	intronic_lncRNA_381	+	13728442,13731723,	13728915,13732036,
chr10	13749993	13750247	intronic_lncRNA_382	+	13749993,	13750247,
chr10	17618851	17619666	intronic_lncRNA_383	-	17618851,	17619666,
chr10	17632921	17633696	intronic_lncRNA_384	-	17632921,	17633696,
chr10	17633961	17634611	intronic_lncRNA_385	+	17633961,	17634611,
chr10	17824101	17824447	intronic_lncRNA_386	+	17824101,	17824447,
chr10	17841319	17841597	intronic_lncRNA_387	+	17841319,	17841597,
chr10	17933997	17934413	intronic_lncRNA_388	-	17933997,	17934413,
chr10	19589240	19589470	intronic_lncRNA_389	-	19589240,	19589470,
chr10	19590642	19590992	intronic_lncRNA_390	-	19590642,	19590992,
chr10	19981792	19986240	intronic_lncRNA_391	+	19981792,19983032,19984347,19984949,19985948,	19982029,19983247,19984874,19985345,19986240,
chr10	20052685	20053050	intronic_lncRNA_392	+	20052685,	20053050,
chr10	20785285	20789596	intronic_lncRNA_393	+	20785285,20786298,20786978,20787923,20788832,20789263,	20785543,20786646,20787788,20788470,20789201,20789596,
chr10	21062398	21087436	intronic_lncRNA_394	+	21062398,21084657,21085964,21086314,21087058,	21062959,21085042,21086172,21086568,21087436,
chr10	24601925	24602192	intronic_lncRNA_395	-	24601925,	24602192,
chr10	24605725	24625211	intronic_lncRNA_396	+	24605725,24606821,24607535,24624341,	24606136,24607090,24607829,24625211,
chr10	25211714	25220776	intronic_lncRNA_397	+	25211714,25216804,25217272,25218428,25219781,25220299,	25212344,25217147,25217570,25218915,25220216,25220776,
chr10	25214025	25214582	intronic_lncRNA_398	+	25214025,	25214582,
chr10	25216374	25216691	intronic_lncRNA_399	+	25216374,	25216691,
chr10	26074943	26075156	intronic_lncRNA_400	-	26074943,	26075156,
chr10	26078992	26079293	intronic_lncRNA_401	-	26078992,	26079293,
chr10	26085234	26085542	intronic_lncRNA_402	-	26085234,	26085542,
chr10	26092758	26093260	intronic_lncRNA_403	+	26092758,	26093260,
chr10	28281957	28286294	intronic_lncRNA_404	+	28281957,28284050,28284709,28285211,	28283572,28284567,28285143,28286294,
chr10	28931722	28943848	intronic_lncRNA_405	+	28931722,28932168,28932841,28935754,28936333,28937123,28943552,	28932000,28932739,28935122,28935959,28937058,28937717,28943848,
chr10	29056216	29057394	intronic_lncRNA_406	-	29056216,29056668,	29056554,29057394,
chr10	29060643	29063923	intronic_lncRNA_407	+	29060643,29063573,	29063459,29063923,
chr10	30267998	30271931	intronic_lncRNA_408	+	30267998,30269049,30270986,	30268754,30269363,30271931,
chr10	30412407	30413382	intronic_lncRNA_409	-	30412407,	30413382,
chr10	33639600	33646679	intronic_lncRNA_410	-	33639600,33640624,33641152,33641436,33641884,33646381,	33640553,33641075,33641371,33641738,33642371,33646679,
chr10	33650773	33651411	intronic_lncRNA_411	-	33650773,	33651411,
chr10	39350235	39352449	intronic_lncRNA_412	-	39350235,39351188,	39350482,39352449,
chr10	39377070	39377524	intronic_lncRNA_413	-	39377070,	39377524,
chr10	39402759	39404258	intronic_lncRNA_414	-	39402759,39403824,	39403451,39404258,
chr10	39574778	39578582	intronic_lncRNA_415	+	39574778,39576632,39577284,39577712,39578330,	39575440,39576935,39577555,39578231,39578582,
chr10	41218615	41233206	intronic_lncRNA_416	+	41218615,41220442,41228427,41232838,	41220327,41220910,41232686,41233206,
chr10	41584317	41584873	intronic_lncRNA_417	+	41584317,	41584873,
chr10	41706567	41706833	intronic_lncRNA_418	-	41706567,	41706833,
chr10	42304670	42305667	intronic_lncRNA_419	+	42304670,42305320,	42305006,42305667,
chr10	43204813	43205230	intronic_lncRNA_420	-	43204813,	43205230,
chr10	43252982	43253225	intronic_lncRNA_421	-	43252982,	43253225,
chr10	45202387	45202970	intronic_lncRNA_422	-	45202387,	45202970,
chr10	45426537	45429614	intronic_lncRNA_423	+	45426537,45427294,45428054,45428409,45428837,	45426879,45427634,45428357,45428726,45429614,
chr10	48962167	48962563	intronic_lncRNA_424	-	48962167,	48962563,
chr10	48978477	48978909	intronic_lncRNA_425	-	48978477,	48978909,
chr10	53019477	53019971	intronic_lncRNA_426	-	53019477,	53019971,
chr10	53355245	53357969	intronic_lncRNA_427	+	53355245,53356372,53356711,53357390,	53355933,53356668,53357070,53357969,
chr10	53358158	53360331	intronic_lncRNA_428	-	53358158,53359881,	53359829,53360331,
chr10	53362776	53363094	intronic_lncRNA_429	-	53362776,	53363094,
chr10	53364198	53364839	intronic_lncRNA_430	+	53364198,	53364839,
chr10	53629938	53630182	intronic_lncRNA_431	-	53629938,	53630182,
chr10	53631531	53631827	intronic_lncRNA_432	-	53631531,	53631827,
chr10	53730134	53730361	intronic_lncRNA_433	-	53730134,	53730361,
chr10	57746936	57747921	intronic_lncRNA_434	-	57746936,57747399,	57747255,57747921,
chr10	57877906	57879146	intronic_lncRNA_435	+	57877906,	57879146,
chr10	57946248	57946630	intronic_lncRNA_436	+	57946248,	57946630,
chr10	57950095	57950592	intronic_lncRNA_437	+	57950095,	57950592,
chr10	58003779	58004024	intronic_lncRNA_438	+	58003779,	58004024,
chr10	58928269	58928599	intronic_lncRNA_439	-	58928269,	58928599,
chr10	59569425	59569628	intronic_lncRNA_440	-	59569425,	59569628,
chr10	61159586	61160990	intronic_lncRNA_441	+	61159586,61160570,	61160025,61160990,
chr10	61893772	61894917	intronic_lncRNA_442	+	61893772,61894608,	61894478,61894917,
chr10	62097281	62097862	intronic_lncRNA_443	-	62097281,	62097862,
chr10	62099277	62099699	intronic_lncRNA_444	-	62099277,	62099699,
chr10	62101836	62102536	intronic_lncRNA_445	-	62101836,	62102536,
chr10	62103730	62104388	intronic_lncRNA_446	-	62103730,62104156,	62104066,62104388,
chr10	62226361	62226700	intronic_lncRNA_447	-	62226361,	62226700,
chr10	62443172	62473484	intronic_lncRNA_448	+	62443172,62467676,62472705,	62444033,62468753,62473484,
chr10	62459586	62460232	intronic_lncRNA_449	+	62459586,	62460232,
chr10	62756611	62757352	intronic_lncRNA_450	-	62756611,62757103,	62756844,62757352,
chr10	62762642	62779870	intronic_lncRNA_451	+	62762642,62763251,62764251,62764979,62766233,62779562,	62762958,62763585,62764798,62765398,62766518,62779870,
chr10	62768071	62768430	intronic_lncRNA_452	+	62768071,	62768430,
chr10	63388262	63390017	intronic_lncRNA_453	-	63388262,63389266,	63388560,63390017,
chr10	63500216	63500680	intronic_lncRNA_454	-	63500216,	63500680,
chr10	63548404	63550120	intronic_lncRNA_455	+	63548404,63549795,	63549064,63550120,
chr10	66488276	66489171	intronic_lncRNA_456	-	66488276,66488925,	66488516,66489171,
chr10	66492371	66493124	intronic_lncRNA_457	+	66492371,66492911,	66492664,66493124,
chr10	66678248	66678503	intronic_lncRNA_458	+	66678248,	66678503,
chr10	66680194	66680658	intronic_lncRNA_459	+	66680194,	66680658,
chr10	66704221	66716904	intronic_lncRNA_460	+	66704221,66704466,66706020,66712945,66713930,66714476,66715553,66715923,66716449,	66704427,66705038,66706513,66713238,66714205,66714844,66715843,66716274,66716904,
chr10	67576339	67576775	intronic_lncRNA_461	+	67576339,	67576775,
chr10	67702086	67702300	intronic_lncRNA_462	-	67702086,	67702300,
chr10	69443451	69457117	intronic_lncRNA_463	+	69443451,69456888,	69443783,69457117,
chr10	70008561	70014198	intronic_lncRNA_464	-	70008561,70009273,70011031,70012815,	70009143,70010312,70012462,70014198,
chr10	70062709	70063226	intronic_lncRNA_465	+	70062709,	70063226,
chr10	72120139	72136587	intronic_lncRNA_466	+	72120139,72127934,72133202,	72120593,72128516,72136587,
chr10	72121833	72122593	intronic_lncRNA_467	+	72121833,72122376,	72122301,72122593,
chr10	72123939	72124198	intronic_lncRNA_468	+	72123939,	72124198,
chr10	72124813	72125033	intronic_lncRNA_469	-	72124813,	72125033,
chr10	72130280	72130561	intronic_lncRNA_470	+	72130280,	72130561,
chr10	74098789	74099191	intronic_lncRNA_471	+	74098789,	74099191,
chr10	74509906	74514455	intronic_lncRNA_472	+	74509906,74511638,74512855,74513469,74513967,	74510269,74512431,74513364,74513731,74514455,
chr10	74977696	74978872	intronic_lncRNA_473	-	74977696,74978130,	74978000,74978872,
chr10	75178510	75179280	intronic_lncRNA_474	-	75178510,	75179280,
chr10	75388713	75389027	intronic_lncRNA_475	-	75388713,	75389027,
chr10	75499699	75499900	intronic_lncRNA_476	+	75499699,	75499900,
chr10	76000478	76018757	intronic_lncRNA_477	+	76000478,76010466,76011055,76014761,76018176,	76001088,76010970,76011264,76015057,76018757,
chr10	76505721	76513820	intronic_lncRNA_478	+	76505721,76506086,76510538,76513374,	76506000,76506614,76510846,76513820,
chr10	76786765	76788205	intronic_lncRNA_479	-	76786765,76787632,	76787505,76788205,
chr10	77442887	77443222	intronic_lncRNA_480	+	77442887,	77443222,
chr10	77629564	77629800	intronic_lncRNA_481	-	77629564,	77629800,
chr10	77634992	77636049	intronic_lncRNA_482	-	77634992,77635448,	77635319,77636049,
chr10	77646514	77646781	intronic_lncRNA_483	-	77646514,	77646781,
chr10	77651955	77653606	intronic_lncRNA_484	-	77651955,77652956,	77652268,77653606,
chr10	77654760	77655075	intronic_lncRNA_485	-	77654760,	77655075,
chr10	77747977	77750550	intronic_lncRNA_486	-	77747977,77749258,	77748209,77750550,
chr10	78210322	78210805	intronic_lncRNA_487	+	78210322,	78210805,
chr10	79006119	79006376	intronic_lncRNA_488	-	79006119,	79006376,
chr10	79011226	79011529	intronic_lncRNA_489	-	79011226,	79011529,
chr10	79084142	79085618	intronic_lncRNA_490	-	79084142,79085360,	79084925,79085618,
chr10	79085903	79086374	intronic_lncRNA_491	-	79085903,	79086374,
chr10	79204964	79205395	intronic_lncRNA_492	-	79204964,	79205395,
chr10	79428164	79429737	intronic_lncRNA_493	+	79428164,79429529,	79428674,79429737,
chr10	79437998	79438365	intronic_lncRNA_494	-	79437998,	79438365,
chr10	79473036	79473361	intronic_lncRNA_495	+	79473036,	79473361,
chr10	79536066	79537566	intronic_lncRNA_496	-	79536066,	79537566,
chr10	79539681	79542345	intronic_lncRNA_497	-	79539681,79540938,	79540813,79542345,
chr10	79631260	79631526	intronic_lncRNA_498	-	79631260,	79631526,
chr10	79633510	79633719	intronic_lncRNA_499	+	79633510,	79633719,
chr10	79741394	79744115	intronic_lncRNA_500	+	79741394,79741673,79742600,79743265,79743897,	79741628,79741959,79743020,79743608,79744115,
chr10	79762321	79762907	intronic_lncRNA_501	+	79762321,	79762907,
chr10	79784965	79785438	intronic_lncRNA_502	-	79784965,	79785438,
chr10	79785938	79786173	intronic_lncRNA_503	-	79785938,	79786173,
chr10	79895308	79895916	intronic_lncRNA_504	-	79895308,	79895916,
chr10	80070547	80071392	intronic_lncRNA_505	+	80070547,	80071392,
chr10	80146297	80146695	intronic_lncRNA_506	+	80146297,	80146695,
chr10	80166162	80166474	intronic_lncRNA_507	+	80166162,	80166474,
chr10	80183495	80183712	intronic_lncRNA_508	-	80183495,	80183712,
chr10	80241851	80242738	intronic_lncRNA_509	+	80241851,80242282,	80242120,80242738,
chr10	80498606	80499302	intronic_lncRNA_510	-	80498606,80499019,	80498940,80499302,
chr10	80582688	80585310	intronic_lncRNA_511	+	80582688,80585103,	80583524,80585310,
chr10	80625535	80625755	intronic_lncRNA_512	-	80625535,	80625755,
chr10	80696541	80713994	intronic_lncRNA_513	+	80696541,80705197,80705944,80707594,80712025,80713487,	80697194,80705453,80706389,80708074,80712413,80713994,
chr10	80717022	80725188	intronic_lncRNA_514	+	80717022,80724907,	80717341,80725188,
chr10	80825949	80826211	intronic_lncRNA_515	-	80825949,	80826211,
chr10	80852489	80852862	intronic_lncRNA_516	+	80852489,	80852862,
chr10	80951454	80952545	intronic_lncRNA_517	-	80951454,	80952545,
chr10	80958507	80958824	intronic_lncRNA_518	-	80958507,	80958824,
chr10	81043689	81052900	intronic_lncRNA_519	+	81043689,81050769,81052434,	81044015,81051005,81052900,
chr10	81069147	81069616	intronic_lncRNA_520	-	81069147,	81069616,
chr10	81096628	81104719	intronic_lncRNA_521	+	81096628,81103753,	81097086,81104719,
chr10	81656211	81656916	intronic_lncRNA_522	+	81656211,	81656916,
chr10	82082999	82085141	intronic_lncRNA_523	-	82082999,82083815,82084882,	82083573,82084036,82085141,
chr10	82170941	82171182	intronic_lncRNA_524	+	82170941,	82171182,
chr10	82202870	82203262	intronic_lncRNA_525	+	82202870,	82203262,
chr10	83044382	83045823	intronic_lncRNA_526	+	83044382,83044798,83045448,	83044632,83045219,83045823,
chr10	84469245	84470705	intronic_lncRNA_527	+	84469245,	84470705,
chr10	84473622	84477444	intronic_lncRNA_528	+	84473622,84474347,84476407,84477216,	84474053,84475284,84476795,84477444,
chr10	84584284	84585446	intronic_lncRNA_529	+	84584284,	84585446,
chr10	84589999	84590408	intronic_lncRNA_530	-	84589999,	84590408,
chr10	85367609	85368060	intronic_lncRNA_531	+	85367609,	85368060,
chr10	85508032	85508425	intronic_lncRNA_532	+	85508032,	85508425,
chr10	85799095	85799394	intronic_lncRNA_533	-	85799095,	85799394,
chr10	86954778	86955081	intronic_lncRNA_534	+	86954778,	86955081,
chr10	87842444	87842649	intronic_lncRNA_535	-	87842444,	87842649,
chr10	87933318	87935224	intronic_lncRNA_536	-	87933318,87934988,	87934104,87935224,
chr10	89115855	89116205	intronic_lncRNA_537	+	89115855,	89116205,
chr10	89271562	89272270	intronic_lncRNA_538	+	89271562,89272002,	89271833,89272270,
chr10	90394360	90394893	intronic_lncRNA_539	+	90394360,	90394893,
chr10	90396597	90396907	intronic_lncRNA_540	+	90396597,	90396907,
chr10	90400895	90402300	intronic_lncRNA_541	-	90400895,	90402300,
chr10	90615604	90615805	intronic_lncRNA_542	-	90615604,	90615805,
chr10	90617075	90618276	intronic_lncRNA_543	-	90617075,90618072,	90617301,90618276,
chr10	91560184	91560823	intronic_lncRNA_544	-	91560184,	91560823,
chr10	91601284	91601768	intronic_lncRNA_545	+	91601284,	91601768,
chr10	91613667	91614210	intronic_lncRNA_546	-	91613667,	91614210,
chr10	91622601	91623201	intronic_lncRNA_547	+	91622601,	91623201,
chr10	91624210	91624614	intronic_lncRNA_548	-	91624210,	91624614,
chr10	92695246	92695578	intronic_lncRNA_549	+	92695246,	92695578,
chr10	92696207	92697988	intronic_lncRNA_550	+	92696207,	92697988,
chr10	92936028	92936259	intronic_lncRNA_551	+	92936028,	92936259,
chr10	93433506	93433995	intronic_lncRNA_552	-	93433506,	93433995,
chr10	93434624	93436232	intronic_lncRNA_553	-	93434624,93435090,93435943,	93435018,93435861,93436232,
chr10	93456793	93457293	intronic_lncRNA_554	-	93456793,	93457293,
chr10	93457985	93459580	intronic_lncRNA_555	-	93457985,93459192,	93458875,93459580,
chr10	94149151	94149616	intronic_lncRNA_556	-	94149151,	94149616,
chr10	94150232	94150745	intronic_lncRNA_557	-	94150232,	94150745,
chr10	94201384	94201865	intronic_lncRNA_558	+	94201384,	94201865,
chr10	94863496	94863820	intronic_lncRNA_559	+	94863496,	94863820,
chr10	98481540	98485427	intronic_lncRNA_560	+	98481540,98481865,98485186,	98481785,98482606,98485427,
chr10	98482961	98483519	intronic_lncRNA_561	+	98482961,	98483519,
chr10	98484394	98484733	intronic_lncRNA_562	+	98484394,	98484733,
chr10	98484805	98485022	intronic_lncRNA_563	+	98484805,	98485022,
chr10	98607280	98607501	intronic_lncRNA_564	-	98607280,	98607501,
chr10	100033532	100034440	intronic_lncRNA_565	-	100033532,	100034440,
chr10	101513584	101514136	intronic_lncRNA_566	+	101513584,	101514136,
chr10	101550793	101552493	intronic_lncRNA_567	-	101550793,	101552493,
chr10	101567417	101567722	intronic_lncRNA_568	+	101567417,	101567722,
chr10	101672245	101672652	intronic_lncRNA_569	+	101672245,	101672652,
chr10	104926650	104927542	intronic_lncRNA_570	+	104926650,	104927542,
chr10	104970289	104971472	intronic_lncRNA_571	-	104970289,	104971472,
chr10	104984228	104984432	intronic_lncRNA_572	-	104984228,	104984432,
chr10	105280103	105282167	intronic_lncRNA_573	+	105280103,105281517,	105280320,105282167,
chr10	106319731	106320541	intronic_lncRNA_574	+	106319731,106320175,	106319954,106320541,
chr10	106321109	106322483	intronic_lncRNA_575	+	106321109,106322068,	106321430,106322483,
chr10	106327607	106328745	intronic_lncRNA_576	+	106327607,106328347,	106327859,106328745,
chr10	107688098	107688322	intronic_lncRNA_577	-	107688098,	107688322,
chr10	107698950	107699185	intronic_lncRNA_578	+	107698950,	107699185,
chr10	107701949	107702423	intronic_lncRNA_579	+	107701949,	107702423,
chr10	107702564	107703786	intronic_lncRNA_580	+	107702564,107703063,	107702931,107703786,
chr10	109269438	109269671	intronic_lncRNA_581	-	109269438,	109269671,
chr10	110384903	110385188	intronic_lncRNA_582	-	110384903,	110385188,
chr10	110385530	110385836	intronic_lncRNA_583	-	110385530,	110385836,
chr10	110386313	110386670	intronic_lncRNA_584	-	110386313,	110386670,
chr10	110685073	110727215	intronic_lncRNA_585	+	110685073,110726989,	110685645,110727215,
chr10	110727543	110728099	intronic_lncRNA_586	+	110727543,	110728099,
chr10	111773627	111773877	intronic_lncRNA_587	+	111773627,	111773877,
chr10	111895712	111898708	intronic_lncRNA_588	+	111895712,111896384,111898328,	111896355,111897759,111898708,
chr10	114641273	114644075	intronic_lncRNA_589	-	114641273,114643394,	114641794,114644075,
chr10	114810126	114813072	intronic_lncRNA_590	-	114810126,114810785,114812604,	114810362,114811259,114813072,
chr10	114817432	114820889	intronic_lncRNA_591	-	114817432,114819587,114820015,114820641,	114818077,114819998,114820412,114820889,
chr10	114822910	114867571	intronic_lncRNA_592	+	114822910,114824041,114826086,114827328,114865142,114867367,	114823199,114824271,114826333,114827617,114865556,114867571,
chr10	114850447	114850756	intronic_lncRNA_593	-	114850447,	114850756,
chr10	116360853	116361342	intronic_lncRNA_594	+	116360853,	116361342,
chr10	116524801	116525045	intronic_lncRNA_595	-	116524801,	116525045,
chr10	116787644	116789538	intronic_lncRNA_596	-	116787644,116788497,116789289,	116787871,116788744,116789538,
chr10	117142349	117143118	intronic_lncRNA_597	-	117142349,	117143118,
chr10	117180682	117181103	intronic_lncRNA_598	+	117180682,	117181103,
chr10	117584262	117593883	intronic_lncRNA_599	+	117584262,117585201,117587509,117588018,117593457,	117585027,117585405,117587718,117588426,117593883,
chr10	118900867	118901168	intronic_lncRNA_600	+	118900867,	118901168,
chr10	118921018	118922215	intronic_lncRNA_601	-	118921018,	118922215,
chr10	118934114	118934803	intronic_lncRNA_602	+	118934114,	118934803,
chr10	118936101	118936585	intronic_lncRNA_603	+	118936101,	118936585,
chr10	118937961	118939935	intronic_lncRNA_604	+	118937961,118939496,	118938230,118939935,
chr10	118941616	118945052	intronic_lncRNA_605	+	118941616,118942402,118944423,	118942111,118942616,118945052,
chr10	118946949	118947363	intronic_lncRNA_606	+	118946949,	118947363,
chr10	118960094	118960892	intronic_lncRNA_607	+	118960094,	118960892,
chr10	118970690	118970961	intronic_lncRNA_608	+	118970690,	118970961,
chr10	119051534	119052204	intronic_lncRNA_609	+	119051534,	119052204,
chr10	119054040	119054406	intronic_lncRNA_610	+	119054040,	119054406,
chr10	119082706	119083166	intronic_lncRNA_611	+	119082706,	119083166,
chr10	119091397	119091792	intronic_lncRNA_612	+	119091397,	119091792,
chr10	119096139	119096708	intronic_lncRNA_613	-	119096139,	119096708,
chr10	119150367	119151095	intronic_lncRNA_614	-	119150367,	119151095,
chr10	119226912	119227294	intronic_lncRNA_615	+	119226912,	119227294,
chr10	119228103	119228318	intronic_lncRNA_616	+	119228103,	119228318,
chr10	119505291	119505883	intronic_lncRNA_617	+	119505291,	119505883,
chr10	119515821	119518493	intronic_lncRNA_618	+	119515821,119518061,	119517552,119518493,
chr10	119656125	119656400	intronic_lncRNA_619	+	119656125,	119656400,
chr10	120369102	120369420	intronic_lncRNA_620	-	120369102,	120369420,
chr10	120372163	120372891	intronic_lncRNA_621	+	120372163,	120372891,
chr10	120810870	120811264	intronic_lncRNA_622	+	120810870,	120811264,
chr10	120984480	120987152	intronic_lncRNA_623	-	120984480,120985415,120985940,	120984933,120985733,120987152,
chr10	120991467	120991898	intronic_lncRNA_624	-	120991467,	120991898,
chr10	121276223	121276434	intronic_lncRNA_625	-	121276223,	121276434,
chr10	122444801	122445177	intronic_lncRNA_626	-	122444801,	122445177,
chr10	122461882	122462235	intronic_lncRNA_627	-	122461882,	122462235,
chr10	122557074	122557283	intronic_lncRNA_628	+	122557074,	122557283,
chr10	122590410	122590690	intronic_lncRNA_629	-	122590410,	122590690,
chr10	126460768	126461085	intronic_lncRNA_630	-	126460768,	126461085,
chr10	126464561	126464999	intronic_lncRNA_631	-	126464561,	126464999,
chr10	126624834	126625860	intronic_lncRNA_632	-	126624834,	126625860,
chr10	126743141	126744579	intronic_lncRNA_633	-	126743141,	126744579,
chr10	126902806	126903997	intronic_lncRNA_634	+	126902806,126903217,126903722,	126903093,126903538,126903997,
chr10	127562809	127563037	intronic_lncRNA_635	+	127562809,	127563037,
chr10	127755403	127755910	intronic_lncRNA_636	+	127755403,	127755910,
chr10	127802938	127804971	intronic_lncRNA_637	-	127802938,127803675,	127803587,127804971,
chr10	127805240	127805742	intronic_lncRNA_638	-	127805240,	127805742,
chr10	127846411	127846764	intronic_lncRNA_639	-	127846411,	127846764,
chr10	127925419	127925945	intronic_lncRNA_640	+	127925419,	127925945,
chr10	127949771	127950327	intronic_lncRNA_641	+	127949771,	127950327,
chr10	127950760	127951469	intronic_lncRNA_642	-	127950760,	127951469,
chr10	128002503	128002726	intronic_lncRNA_643	-	128002503,	128002726,
chr10	128078370	128078831	intronic_lncRNA_644	-	128078370,	128078831,
chr10	128080077	128080528	intronic_lncRNA_645	+	128080077,	128080528,
chr10	128081977	128082645	intronic_lncRNA_646	-	128081977,	128082645,
chr10	128083137	128084333	intronic_lncRNA_647	+	128083137,128083957,	128083853,128084333,
chr10	128138154	128138397	intronic_lncRNA_648	-	128138154,	128138397,
chr10	128247191	128247569	intronic_lncRNA_649	+	128247191,	128247569,
chr10	128310371	128310730	intronic_lncRNA_650	-	128310371,	128310730,
chr10	128352313	128352712	intronic_lncRNA_651	-	128352313,	128352712,
chr10	128353590	128354266	intronic_lncRNA_652	+	128353590,	128354266,
chr11	3047979	3048365	intronic_lncRNA_653	+	3047979,	3048365,
chr11	3053631	3054428	intronic_lncRNA_654	+	3053631,3054099,	3053867,3054428,
chr11	3061625	3061886	intronic_lncRNA_655	-	3061625,	3061886,
chr11	3069376	3069978	intronic_lncRNA_656	-	3069376,	3069978,
chr11	3072269	3073829	intronic_lncRNA_657	+	3072269,3072783,	3072613,3073829,
chr11	3075176	3075514	intronic_lncRNA_658	+	3075176,	3075514,
chr11	3090018	3090628	intronic_lncRNA_659	-	3090018,	3090628,
chr11	3090803	3091387	intronic_lncRNA_660	-	3090803,	3091387,
chr11	3095589	3095893	intronic_lncRNA_661	+	3095589,	3095893,
chr11	3101460	3102013	intronic_lncRNA_662	-	3101460,	3102013,
chr11	3146391	3146719	intronic_lncRNA_663	-	3146391,	3146719,
chr11	3148094	3149066	intronic_lncRNA_664	-	3148094,3148479,	3148396,3149066,
chr11	3205504	3205837	intronic_lncRNA_665	-	3205504,	3205837,
chr11	3223013	3224334	intronic_lncRNA_666	+	3223013,3223809,	3223745,3224334,
chr11	3252994	3253272	intronic_lncRNA_667	-	3252994,	3253272,
chr11	3418071	3420383	intronic_lncRNA_668	-	3418071,3418494,3420094,	3418471,3419284,3420383,
chr11	3605817	3608260	intronic_lncRNA_669	-	3605817,3607104,3607950,	3606278,3607661,3608260,
chr11	3609588	3610742	intronic_lncRNA_670	-	3609588,3610480,	3609810,3610742,
chr11	3611346	3611688	intronic_lncRNA_671	-	3611346,	3611688,
chr11	4004063	4004817	intronic_lncRNA_672	-	4004063,	4004817,
chr11	4052008	4052814	intronic_lncRNA_673	-	4052008,	4052814,
chr11	4053664	4054324	intronic_lncRNA_674	-	4053664,	4054324,
chr11	4567673	4568157	intronic_lncRNA_675	+	4567673,	4568157,
chr11	4636992	4637322	intronic_lncRNA_676	-	4636992,	4637322,
chr11	4780623	4781609	intronic_lncRNA_677	+	4780623,4781355,	4780919,4781609,
chr11	4788510	4788880	intronic_lncRNA_678	+	4788510,	4788880,
chr11	4934380	4937369	intronic_lncRNA_679	+	4934380,	4937369,
chr11	4979080	4979427	intronic_lncRNA_680	-	4979080,	4979427,
chr11	5003380	5004009	intronic_lncRNA_681	+	5003380,	5004009,
chr11	5022891	5024523	intronic_lncRNA_682	+	5022891,	5024523,
chr11	5432599	5432957	intronic_lncRNA_683	+	5432599,	5432957,
chr11	5577537	5577815	intronic_lncRNA_684	+	5577537,	5577815,
chr11	5659077	5659381	intronic_lncRNA_685	-	5659077,	5659381,
chr11	5660853	5661165	intronic_lncRNA_686	-	5660853,	5661165,
chr11	5667659	5667978	intronic_lncRNA_687	+	5667659,	5667978,
chr11	5702052	5702481	intronic_lncRNA_688	+	5702052,	5702481,
chr11	6289792	6295127	intronic_lncRNA_689	+	6289792,6293839,6294097,	6290192,6294043,6295127,
chr11	6291158	6293126	intronic_lncRNA_690	-	6291158,	6293126,
chr11	6376156	6382033	intronic_lncRNA_691	+	6376156,6376705,6377886,6381793,	6376626,6377698,6378114,6382033,
chr11	6504333	6504749	intronic_lncRNA_692	+	6504333,	6504749,
chr11	6521966	6522387	intronic_lncRNA_693	-	6521966,	6522387,
chr11	11164049	11165967	intronic_lncRNA_694	+	11164049,11165287,11165652,	11164337,11165556,11165967,
chr11	11362503	11362894	intronic_lncRNA_695	+	11362503,	11362894,
chr11	11855586	11855853	intronic_lncRNA_696	-	11855586,	11855853,
chr11	11860673	11860947	intronic_lncRNA_697	-	11860673,	11860947,
chr11	16181352	16181843	intronic_lncRNA_698	+	16181352,	16181843,
chr11	17097940	17098196	intronic_lncRNA_699	-	17097940,	17098196,
chr11	20132113	20135837	intronic_lncRNA_700	-	20132113,20135161,	20134903,20135837,
chr11	20136967	20137803	intronic_lncRNA_701	+	20136967,	20137803,
chr11	20206625	20206849	intronic_lncRNA_702	-	20206625,	20206849,
chr11	20593227	20594194	intronic_lncRNA_703	+	20593227,20593884,	20593623,20594194,
chr11	20595397	20596315	intronic_lncRNA_704	-	20595397,20595718,	20595609,20596315,
chr11	21045646	21046069	intronic_lncRNA_705	+	21045646,	21046069,
chr11	21214260	21214601	intronic_lncRNA_706	+	21214260,	21214601,
chr11	21218889	21219468	intronic_lncRNA_707	+	21218889,	21219468,
chr11	23167919	23168277	intronic_lncRNA_708	+	23167919,	23168277,
chr11	23170688	23170968	intronic_lncRNA_709	+	23170688,	23170968,
chr11	23376991	23377283	intronic_lncRNA_710	+	23376991,	23377283,
chr11	23377489	23379334	intronic_lncRNA_711	+	23377489,23378039,	23377920,23379334,
chr11	23380589	23382064	intronic_lncRNA_712	+	23380589,	23382064,
chr11	23553725	23555177	intronic_lncRNA_713	-	23553725,23554802,	23554524,23555177,
chr11	23556974	23558016	intronic_lncRNA_714	-	23556974,23557534,	23557420,23558016,
chr11	23558596	23563157	intronic_lncRNA_715	-	23558596,23562802,	23559635,23563157,
chr11	23607672	23608401	intronic_lncRNA_716	+	23607672,	23608401,
chr11	23613398	23615267	intronic_lncRNA_717	+	23613398,23614713,	23614017,23615267,
chr11	23626415	23628820	intronic_lncRNA_718	-	23626415,23627721,	23627198,23628820,
chr11	23973858	23975007	intronic_lncRNA_719	-	23973858,23974623,	23974552,23975007,
chr11	25504380	25510018	intronic_lncRNA_720	-	25504380,25509177,	25509019,25510018,
chr11	25513503	25516702	intronic_lncRNA_721	-	25513503,25514143,25515148,	25513774,25514862,25516702,
chr11	28288969	28290431	intronic_lncRNA_722	-	28288969,28290154,	28289626,28290431,
chr11	28296293	28296519	intronic_lncRNA_723	-	28296293,	28296519,
chr11	29045853	29046694	intronic_lncRNA_724	+	29045853,	29046694,
chr11	29115502	29117968	intronic_lncRNA_725	-	29115502,29117382,	29117081,29117968,
chr11	29118100	29118433	intronic_lncRNA_726	-	29118100,	29118433,
chr11	29397984	29405133	intronic_lncRNA_727	+	29397984,29404629,	29398405,29405133,
chr11	29431056	29431748	intronic_lncRNA_728	-	29431056,29431464,	29431387,29431748,
chr11	29432280	29444848	intronic_lncRNA_729	+	29432280,29444431,	29432481,29444848,
chr11	29666227	29675962	intronic_lncRNA_730	-	29666227,29667631,29668313,29670807,29672000,29672700,29674080,29675545,	29667523,29668178,29668787,29671280,29672363,29673643,29674365,29675962,
chr11	30130412	30131047	intronic_lncRNA_731	-	30130412,	30131047,
chr11	30168358	30169363	intronic_lncRNA_732	+	30168358,30169035,	30168671,30169363,
chr11	30513898	30514153	intronic_lncRNA_733	-	30513898,	30514153,
chr11	30692579	30692826	intronic_lncRNA_734	+	30692579,	30692826,
chr11	30723465	30778830	intronic_lncRNA_735	+	30723465,30725749,30726928,30778578,	30723746,30725993,30727151,30778830,
chr11	30831875	30832176	intronic_lncRNA_736	-	30831875,	30832176,
chr11	30832940	30833450	intronic_lncRNA_737	-	30832940,	30833450,
chr11	30833559	30833811	intronic_lncRNA_738	-	30833559,	30833811,
chr11	30834242	30834670	intronic_lncRNA_739	-	30834242,	30834670,
chr11	30884069	30884323	intronic_lncRNA_740	-	30884069,	30884323,
chr11	32130430	32130855	intronic_lncRNA_741	+	32130430,	32130855,
chr11	32290571	32290830	intronic_lncRNA_742	+	32290571,	32290830,
chr11	33327864	33328298	intronic_lncRNA_743	-	33327864,	33328298,
chr11	33537409	33537739	intronic_lncRNA_744	+	33537409,	33537739,
chr11	35143977	35144515	intronic_lncRNA_745	+	35143977,	35144515,
chr11	35427369	35427586	intronic_lncRNA_746	+	35427369,	35427586,
chr11	35431508	35432419	intronic_lncRNA_747	+	35431508,	35432419,
chr11	35705620	35705868	intronic_lncRNA_748	-	35705620,	35705868,
chr11	36359588	36359823	intronic_lncRNA_749	+	36359588,	36359823,
chr11	36369217	36369453	intronic_lncRNA_750	-	36369217,	36369453,
chr11	36381705	36382082	intronic_lncRNA_751	-	36381705,	36382082,
chr11	36412125	36412425	intronic_lncRNA_752	-	36412125,	36412425,
chr11	36419446	36419699	intronic_lncRNA_753	-	36419446,	36419699,
chr11	36438688	36447593	intronic_lncRNA_754	-	36438688,36439002,36439326,36439803,36440123,36440504,36441357,36442139,36442813,36443538,36444582,36446552,36447221,	36438945,36439257,36439585,36440040,36440397,36441317,36442067,36442769,36443367,36443907,36445616,36447021,36447593,
chr11	36481700	36484820	intronic_lncRNA_755	-	36481700,36483528,36484127,36484518,	36482874,36483947,36484438,36484820,
chr11	36485922	36486137	intronic_lncRNA_756	-	36485922,	36486137,
chr11	36487437	36488441	intronic_lncRNA_757	-	36487437,	36488441,
chr11	36488712	36490728	intronic_lncRNA_758	-	36488712,36489591,	36489497,36490728,
chr11	36599244	36599501	intronic_lncRNA_759	-	36599244,	36599501,
chr11	36621305	36621659	intronic_lncRNA_760	+	36621305,	36621659,
chr11	36953026	36954651	intronic_lncRNA_761	+	36953026,	36954651,
chr11	37012031	37012750	intronic_lncRNA_762	-	37012031,	37012750,
chr11	37012866	37013167	intronic_lncRNA_763	-	37012866,	37013167,
chr11	37046880	37048263	intronic_lncRNA_764	-	37046880,37047822,	37047322,37048263,
chr11	40494918	40495214	intronic_lncRNA_765	+	40494918,	40495214,
chr11	43374006	43374465	intronic_lncRNA_766	+	43374006,	43374465,
chr11	43517190	43533630	intronic_lncRNA_767	+	43517190,43521403,43524652,43525715,43527283,43527890,43531757,43532696,	43517769,43522043,43525367,43526108,43527572,43529140,43532142,43533630,
chr11	43522896	43523231	intronic_lncRNA_768	+	43522896,	43523231,
chr11	43544285	43545699	intronic_lncRNA_769	-	43544285,43545452,	43545019,43545699,
chr11	43546866	43548572	intronic_lncRNA_770	-	43546866,43547996,43548336,	43547358,43548306,43548572,
chr11	44280637	44280947	intronic_lncRNA_771	-	44280637,	44280947,
chr11	44281826	44282173	intronic_lncRNA_772	-	44281826,	44282173,
chr11	44283004	44283361	intronic_lncRNA_773	+	44283004,	44283361,
chr11	44464854	44465065	intronic_lncRNA_774	-	44464854,	44465065,
chr11	44475826	44476048	intronic_lncRNA_775	-	44475826,	44476048,
chr11	44478251	44478532	intronic_lncRNA_776	+	44478251,	44478532,
chr11	44554483	44554839	intronic_lncRNA_777	+	44554483,	44554839,
chr11	46014766	46015029	intronic_lncRNA_778	-	46014766,	46015029,
chr11	46251890	46252470	intronic_lncRNA_779	+	46251890,	46252470,
chr11	46784962	46785840	intronic_lncRNA_780	-	46784962,46785287,	46785281,46785840,
chr11	46786129	46790114	intronic_lncRNA_781	-	46786129,46789890,	46786379,46790114,
chr11	49020408	49021308	intronic_lncRNA_782	+	49020408,49021002,	49020745,49021308,
chr11	49027472	49027723	intronic_lncRNA_783	+	49027472,	49027723,
chr11	49063365	49063976	intronic_lncRNA_784	+	49063365,	49063976,
chr11	49489758	49490061	intronic_lncRNA_785	-	49489758,	49490061,
chr11	49492794	49493044	intronic_lncRNA_786	-	49492794,	49493044,
chr11	49686992	49691214	intronic_lncRNA_787	+	49686992,49689740,	49687301,49691214,
chr11	49947588	49947812	intronic_lncRNA_788	-	49947588,	49947812,
chr11	49948559	49979225	intronic_lncRNA_789	+	49948559,49977761,49978132,49978442,	49948869,49978021,49978392,49979225,
chr11	49979558	49979820	intronic_lncRNA_790	+	49979558,	49979820,
chr11	50025191	50038737	intronic_lncRNA_791	+	50025191,50026565,50027837,50030872,50031958,50033811,50035920,	50025772,50027289,50028320,50031448,50033749,50035798,50038737,
chr11	50193784	50198145	intronic_lncRNA_792	+	50193784,50197926,	50194030,50198145,
chr11	50221484	50221775	intronic_lncRNA_793	+	50221484,	50221775,
chr11	50221868	50223206	intronic_lncRNA_794	+	50221868,50222960,	50222162,50223206,
chr11	50607316	50607694	intronic_lncRNA_795	+	50607316,	50607694,
chr11	50616866	50617069	intronic_lncRNA_796	+	50616866,	50617069,
chr11	50633530	50634058	intronic_lncRNA_797	+	50633530,	50634058,
chr11	50715030	50717934	intronic_lncRNA_798	-	50715030,50716785,	50716732,50717934,
chr11	50719676	50720226	intronic_lncRNA_799	-	50719676,	50720226,
chr11	51081210	51090415	intronic_lncRNA_800	+	51081210,51084687,51087239,51090024,	51081443,51085011,51087507,51090415,
chr11	51403322	51403527	intronic_lncRNA_801	-	51403322,	51403527,
chr11	51408341	51410093	intronic_lncRNA_802	+	51408341,	51410093,
chr11	51802206	51802517	intronic_lncRNA_803	-	51802206,	51802517,
chr11	51803084	51803597	intronic_lncRNA_804	-	51803084,	51803597,
chr11	51803739	51804617	intronic_lncRNA_805	+	51803739,	51804617,
chr11	51805010	51805237	intronic_lncRNA_806	-	51805010,	51805237,
chr11	51805899	51808021	intronic_lncRNA_807	-	51805899,51806725,	51806664,51808021,
chr11	51808110	51808869	intronic_lncRNA_808	-	51808110,	51808869,
chr11	51808979	51810441	intronic_lncRNA_809	-	51808979,51809384,51810150,	51809182,51809614,51810441,
chr11	51810594	51811070	intronic_lncRNA_810	+	51810594,	51811070,
chr11	51818056	51818403	intronic_lncRNA_811	+	51818056,	51818403,
chr11	51859787	51860663	intronic_lncRNA_812	+	51859787,	51860663,
chr11	51898977	51899184	intronic_lncRNA_813	+	51898977,	51899184,
chr11	53352628	53352879	intronic_lncRNA_814	+	53352628,	53352879,
chr11	53404812	53405568	intronic_lncRNA_815	+	53404812,	53405568,
chr11	53683378	53684105	intronic_lncRNA_816	+	53683378,	53684105,
chr11	53688670	53689495	intronic_lncRNA_817	-	53688670,	53689495,
chr11	53689762	53691321	intronic_lncRNA_818	-	53689762,	53691321,
chr11	53692040	53694605	intronic_lncRNA_819	-	53692040,53694003,	53693916,53694605,
chr11	53695603	53696612	intronic_lncRNA_820	-	53695603,53696220,	53696017,53696612,
chr11	53868994	53869283	intronic_lncRNA_821	-	53868994,	53869283,
chr11	54298436	54299167	intronic_lncRNA_822	+	54298436,	54299167,
chr11	54505628	54509497	intronic_lncRNA_823	+	54505628,54506195,54508082,54508771,	54506090,54506838,54508586,54509497,
chr11	54651411	54652453	intronic_lncRNA_824	-	54651411,	54652453,
chr11	57104416	57139758	intronic_lncRNA_825	+	57104416,57105162,57114731,57116501,57118137,57120429,57121018,57121618,57121913,57124630,57125219,57125755,57126223,57127625,57128822,57129223,57131721,57135886,57137762,57139268,	57104708,57105529,57115039,57117126,57118543,57120868,57121343,57121830,57122293,57125161,57125456,57125963,57126584,57128614,57129153,57131161,57131950,57136103,57138050,57139758,
chr11	57310300	57312886	intronic_lncRNA_826	-	57310300,	57312886,
chr11	57315000	57315399	intronic_lncRNA_827	-	57315000,	57315399,
chr11	57317660	57318378	intronic_lncRNA_828	-	57317660,	57318378,
chr11	57331555	57331967	intronic_lncRNA_829	-	57331555,	57331967,
chr11	57613779	57614078	intronic_lncRNA_830	-	57613779,	57614078,
chr11	57870891	57871173	intronic_lncRNA_831	+	57870891,	57871173,
chr11	57871588	57871851	intronic_lncRNA_832	+	57871588,	57871851,
chr11	57946956	57947195	intronic_lncRNA_833	-	57946956,	57947195,
chr11	58141210	58142965	intronic_lncRNA_834	-	58141210,58142136,58142531,	58141651,58142415,58142965,
chr11	58670103	58671424	intronic_lncRNA_835	+	58670103,58670849,	58670359,58671424,
chr11	58771204	58771542	intronic_lncRNA_836	+	58771204,	58771542,
chr11	58795825	58801907	intronic_lncRNA_837	+	58795825,58796521,58797109,58801329,	58796511,58796878,58801024,58801907,
chr11	59015095	59015622	intronic_lncRNA_838	-	59015095,	59015622,
chr11	59016519	59017673	intronic_lncRNA_839	+	59016519,59017381,	59016788,59017673,
chr11	59285290	59285579	intronic_lncRNA_840	-	59285290,	59285579,
chr11	59308957	59311641	intronic_lncRNA_841	-	59308957,59311109,	59309289,59311641,
chr11	59321463	59322995	intronic_lncRNA_842	+	59321463,59321983,	59321731,59322995,
chr11	59331291	59333668	intronic_lncRNA_843	+	59331291,	59333668,
chr11	59551534	59552806	intronic_lncRNA_844	+	59551534,59552277,	59551755,59552806,
chr11	59553879	59554098	intronic_lncRNA_845	+	59553879,	59554098,
chr11	59587344	59587928	intronic_lncRNA_846	+	59587344,59587701,	59587646,59587928,
chr11	59608321	59608639	intronic_lncRNA_847	-	59608321,	59608639,
chr11	59658200	59658853	intronic_lncRNA_848	-	59658200,	59658853,
chr11	59658972	59660766	intronic_lncRNA_849	+	59658972,59659608,	59659287,59660766,
chr11	59665865	59666104	intronic_lncRNA_850	+	59665865,	59666104,
chr11	59687438	59687683	intronic_lncRNA_851	+	59687438,	59687683,
chr11	59954178	59954644	intronic_lncRNA_852	+	59954178,	59954644,
chr11	60215653	60215970	intronic_lncRNA_853	-	60215653,	60215970,
chr11	60218431	60218924	intronic_lncRNA_854	-	60218431,	60218924,
chr11	60221238	60221745	intronic_lncRNA_855	-	60221238,	60221745,
chr11	60228298	60228840	intronic_lncRNA_856	-	60228298,	60228840,
chr11	60273594	60273811	intronic_lncRNA_857	+	60273594,	60273811,
chr11	60605848	60606336	intronic_lncRNA_858	+	60605848,	60606336,
chr11	60607246	60607530	intronic_lncRNA_859	+	60607246,	60607530,
chr11	61060528	61060946	intronic_lncRNA_860	-	61060528,	61060946,
chr11	61061151	61061596	intronic_lncRNA_861	-	61061151,	61061596,
chr11	61266452	61266899	intronic_lncRNA_862	-	61266452,	61266899,
chr11	61319500	61325617	intronic_lncRNA_863	+	61319500,61321969,61322674,61325358,	61319839,61322301,61322940,61325617,
chr11	61692933	61693184	intronic_lncRNA_864	-	61692933,	61693184,
chr11	61951547	61953179	intronic_lncRNA_865	+	61951547,61952017,	61951828,61953179,
chr11	62085953	62086344	intronic_lncRNA_866	-	62085953,	62086344,
chr11	62272227	62272982	intronic_lncRNA_867	+	62272227,	62272982,
chr11	62347777	62348566	intronic_lncRNA_868	-	62347777,	62348566,
chr11	62348987	62349557	intronic_lncRNA_869	-	62348987,	62349557,
chr11	62350959	62351534	intronic_lncRNA_870	+	62350959,	62351534,
chr11	62594931	62596930	intronic_lncRNA_871	-	62594931,62596674,	62595628,62596930,
chr11	63783424	63783890	intronic_lncRNA_872	+	63783424,	63783890,
chr11	63894171	63894700	intronic_lncRNA_873	+	63894171,	63894700,
chr11	65559053	65559311	intronic_lncRNA_874	-	65559053,	65559311,
chr11	66188009	66188349	intronic_lncRNA_875	-	66188009,	66188349,
chr11	66854038	66854431	intronic_lncRNA_876	-	66854038,	66854431,
chr11	68636179	68636450	intronic_lncRNA_877	-	68636179,	68636450,
chr11	68637220	68638379	intronic_lncRNA_878	-	68637220,68637618,68638070,	68637453,68637925,68638379,
chr11	68638920	68639658	intronic_lncRNA_879	+	68638920,68639373,	68639206,68639658,
chr11	68641563	68642268	intronic_lncRNA_880	-	68641563,	68642268,
chr11	68718227	68718569	intronic_lncRNA_881	+	68718227,	68718569,
chr11	68719682	68720004	intronic_lncRNA_882	+	68719682,	68720004,
chr11	68758380	68759660	intronic_lncRNA_883	-	68758380,68758871,	68758593,68759660,
chr11	68812168	68813108	intronic_lncRNA_884	+	68812168,68812575,	68812518,68813108,
chr11	68935749	68936027	intronic_lncRNA_885	+	68935749,	68936027,
chr11	69132983	69133344	intronic_lncRNA_886	-	69132983,	69133344,
chr11	69133675	69134311	intronic_lncRNA_887	-	69133675,69134007,	69133900,69134311,
chr11	69140793	69141083	intronic_lncRNA_888	+	69140793,	69141083,
chr11	69225350	69225877	intronic_lncRNA_889	+	69225350,	69225877,
chr11	69326075	69327223	intronic_lncRNA_890	-	69326075,	69327223,
chr11	69371041	69373193	intronic_lncRNA_891	-	69371041,69372234,69372722,	69372090,69372683,69373193,
chr11	69394109	69394424	intronic_lncRNA_892	+	69394109,	69394424,
chr11	69395028	69395323	intronic_lncRNA_893	+	69395028,	69395323,
chr11	69396745	69397089	intronic_lncRNA_894	+	69396745,	69397089,
chr11	69450407	69450627	intronic_lncRNA_895	-	69450407,	69450627,
chr11	69473432	69473790	intronic_lncRNA_896	-	69473432,	69473790,
chr11	69489439	69489876	intronic_lncRNA_897	-	69489439,	69489876,
chr11	69613782	69614930	intronic_lncRNA_898	-	69613782,	69614930,
chr11	69711257	69711592	intronic_lncRNA_899	-	69711257,	69711592,
chr11	69750050	69752598	intronic_lncRNA_900	+	69750050,69751296,69751880,69752315,	69750390,69751632,69752306,69752598,
chr11	69785026	69786622	intronic_lncRNA_901	-	69785026,	69786622,
chr11	70026823	70028446	intronic_lncRNA_902	+	70026823,70028229,	70027175,70028446,
chr11	70252356	70252573	intronic_lncRNA_903	+	70252356,	70252573,
chr11	70360193	70364369	intronic_lncRNA_904	+	70360193,70362870,70363966,	70360827,70363211,70364369,
chr11	70461658	70461869	intronic_lncRNA_905	+	70461658,	70461869,
chr11	70486116	70486585	intronic_lncRNA_906	-	70486116,	70486585,
chr11	70492521	70492810	intronic_lncRNA_907	-	70492521,	70492810,
chr11	70660283	70660549	intronic_lncRNA_908	+	70660283,	70660549,
chr11	70660973	70661209	intronic_lncRNA_909	+	70660973,	70661209,
chr11	70788738	70790094	intronic_lncRNA_910	+	70788738,	70790094,
chr11	70807537	70808637	intronic_lncRNA_911	-	70807537,70808265,	70808206,70808637,
chr11	70824643	70825323	intronic_lncRNA_912	-	70824643,	70825323,
chr11	70826183	70826567	intronic_lncRNA_913	-	70826183,	70826567,
chr11	71599895	71600193	intronic_lncRNA_914	+	71599895,	71600193,
chr11	71877002	71877403	intronic_lncRNA_915	-	71877002,	71877403,
chr11	71969514	71970065	intronic_lncRNA_916	-	71969514,	71970065,
chr11	71976123	71976340	intronic_lncRNA_917	-	71976123,	71976340,
chr11	71976910	71978856	intronic_lncRNA_918	+	71976910,71977622,71978310,	71977345,71978175,71978856,
chr11	71979711	71980054	intronic_lncRNA_919	-	71979711,	71980054,
chr11	72026391	72027126	intronic_lncRNA_920	+	72026391,	72027126,
chr11	72124914	72125198	intronic_lncRNA_921	+	72124914,	72125198,
chr11	72577758	72580228	intronic_lncRNA_922	+	72577758,72579876,	72577961,72580228,
chr11	72727827	72735639	intronic_lncRNA_923	+	72727827,72731467,72732422,72734753,72735350,	72728064,72731948,72733200,72735168,72735639,
chr11	72999972	73001020	intronic_lncRNA_924	-	72999972,	73001020,
chr11	73002324	73003770	intronic_lncRNA_925	+	73002324,73003146,	73002789,73003770,
chr11	73009207	73009463	intronic_lncRNA_926	-	73009207,	73009463,
chr11	74477654	74479161	intronic_lncRNA_927	+	74477654,74478956,	74477960,74479161,
chr11	74666013	74666526	intronic_lncRNA_928	-	74666013,	74666526,
chr11	74668745	74669753	intronic_lncRNA_929	-	74668745,74669394,	74669325,74669753,
chr11	74696442	74696653	intronic_lncRNA_930	-	74696442,	74696653,
chr11	74727677	74731886	intronic_lncRNA_931	-	74727677,74729486,74731361,	74728709,74730085,74731886,
chr11	74732360	74732594	intronic_lncRNA_932	-	74732360,	74732594,
chr11	74733317	74738817	intronic_lncRNA_933	-	74733317,74734723,74737232,74738356,	74734651,74735945,74738080,74738817,
chr11	74971147	74975522	intronic_lncRNA_934	+	74971147,74971851,74974522,	74971627,74972532,74975522,
chr11	74987852	74989012	intronic_lncRNA_935	+	74987852,74988244,74988780,	74988054,74988633,74989012,
chr11	75197632	75198042	intronic_lncRNA_936	-	75197632,	75198042,
chr11	75259950	75260838	intronic_lncRNA_937	-	75259950,75260419,	75260360,75260838,
chr11	75277924	75278236	intronic_lncRNA_938	+	75277924,	75278236,
chr11	75377257	75379382	intronic_lncRNA_939	+	75377257,75377825,75378347,75379153,	75377610,75378183,75379073,75379382,
chr11	75451331	75460284	intronic_lncRNA_940	+	75451331,75457512,75459988,	75451557,75458065,75460284,
chr11	75508931	75509170	intronic_lncRNA_941	+	75508931,	75509170,
chr11	75512510	75512858	intronic_lncRNA_942	+	75512510,	75512858,
chr11	75513313	75513592	intronic_lncRNA_943	+	75513313,	75513592,
chr11	75994929	75995892	intronic_lncRNA_944	+	75994929,75995470,	75995228,75995892,
chr11	76032962	76033224	intronic_lncRNA_945	+	76032962,	76033224,
chr11	76600885	76601300	intronic_lncRNA_946	-	76600885,	76601300,
chr11	77787485	77787691	intronic_lncRNA_947	+	77787485,	77787691,
chr11	77847292	77868247	intronic_lncRNA_948	+	77847292,77848949,77849821,77852168,77864497,77866234,77867599,	77847506,77849427,77850350,77852441,77864758,77866624,77868247,
chr11	77923084	77923298	intronic_lncRNA_949	+	77923084,	77923298,
chr11	77963020	77963256	intronic_lncRNA_950	+	77963020,	77963256,
chr11	78062701	78066972	intronic_lncRNA_951	+	78062701,78065240,78066584,	78063044,78065531,78066972,
chr11	78153627	78154025	intronic_lncRNA_952	+	78153627,	78154025,
chr11	78160476	78160685	intronic_lncRNA_953	+	78160476,	78160685,
chr11	78830064	78830821	intronic_lncRNA_954	-	78830064,	78830821,
chr11	79057234	79057593	intronic_lncRNA_955	-	79057234,	79057593,
chr11	79057645	79057960	intronic_lncRNA_956	-	79057645,	79057960,
chr11	79334264	79334526	intronic_lncRNA_957	-	79334264,	79334526,
chr11	79385198	79389526	intronic_lncRNA_958	+	79385198,79385979,79387538,79388392,	79385558,79386323,79388318,79389526,
chr11	79843602	79844299	intronic_lncRNA_959	+	79843602,79843968,	79843838,79844299,
chr11	79844477	79844963	intronic_lncRNA_960	+	79844477,	79844963,
chr11	79864691	79868787	intronic_lncRNA_961	-	79864691,79866211,79867983,	79864911,79867884,79868787,
chr11	79934530	79935414	intronic_lncRNA_962	+	79934530,	79935414,
chr11	80161100	80161567	intronic_lncRNA_963	+	80161100,	80161567,
chr11	80209806	80215736	intronic_lncRNA_964	+	80209806,80210597,80211246,80212137,80214670,	80210584,80211179,80211461,80214575,80215736,
chr11	80580361	80584818	intronic_lncRNA_965	-	80580361,80581954,80582781,80583376,	80580716,80582669,80583371,80584818,
chr11	82717069	82717393	intronic_lncRNA_966	-	82717069,	82717393,
chr11	83253368	83253679	intronic_lncRNA_967	-	83253368,	83253679,
chr11	83305034	83311189	intronic_lncRNA_968	+	83305034,83305599,83306547,83306965,83307852,83308532,83309200,83309714,83310816,	83305411,83305952,83306847,83307461,83308061,83308820,83309458,83309956,83311189,
chr11	83589362	83589800	intronic_lncRNA_969	+	83589362,	83589800,
chr11	83823072	83825577	intronic_lncRNA_970	+	83823072,83823818,	83823802,83825577,
chr11	83852147	83852379	intronic_lncRNA_971	+	83852147,	83852379,
chr11	83897723	83897943	intronic_lncRNA_972	-	83897723,	83897943,
chr11	83901120	83901515	intronic_lncRNA_973	-	83901120,	83901515,
chr11	84246341	84246873	intronic_lncRNA_974	-	84246341,	84246873,
chr11	84340006	84348386	intronic_lncRNA_975	+	84340006,84341124,84341511,84342423,84343804,84348179,	84341116,84341436,84342200,84343702,84346552,84348386,
chr11	84646751	84647002	intronic_lncRNA_976	-	84646751,	84647002,
chr11	84647195	84647552	intronic_lncRNA_977	-	84647195,	84647552,
chr11	84668454	84668998	intronic_lncRNA_978	-	84668454,84668745,	84668666,84668998,
chr11	84669140	84669872	intronic_lncRNA_979	-	84669140,	84669872,
chr11	84669976	84670679	intronic_lncRNA_980	-	84669976,84670322,	84670184,84670679,
chr11	84671299	84671550	intronic_lncRNA_981	-	84671299,	84671550,
chr11	84727958	84728579	intronic_lncRNA_982	-	84727958,	84728579,
chr11	86030222	86030724	intronic_lncRNA_983	+	86030222,	86030724,
chr11	86049229	86057844	intronic_lncRNA_984	-	86049229,86057397,	86049545,86057844,
chr11	86070228	86070483	intronic_lncRNA_985	-	86070228,	86070483,
chr11	86302987	86303686	intronic_lncRNA_986	+	86302987,	86303686,
chr11	86317524	86317726	intronic_lncRNA_987	+	86317524,	86317726,
chr11	86318488	86318950	intronic_lncRNA_988	-	86318488,	86318950,
chr11	86319386	86319777	intronic_lncRNA_989	-	86319386,	86319777,
chr11	86321933	86322417	intronic_lncRNA_990	-	86321933,	86322417,
chr11	86323860	86324075	intronic_lncRNA_991	+	86323860,	86324075,
chr11	86498146	86498854	intronic_lncRNA_992	+	86498146,	86498854,
chr11	86501975	86502616	intronic_lncRNA_993	+	86501975,	86502616,
chr11	86764404	86764696	intronic_lncRNA_994	-	86764404,	86764696,
chr11	86878551	86878854	intronic_lncRNA_995	-	86878551,	86878854,
chr11	86885012	86885220	intronic_lncRNA_996	-	86885012,	86885220,
chr11	87055988	87056209	intronic_lncRNA_997	-	87055988,	87056209,
chr11	87397537	87401327	intronic_lncRNA_998	+	87397537,87399655,87400987,	87397789,87400130,87401327,
chr11	87586925	87588015	intronic_lncRNA_999	+	87586925,87587377,	87587226,87588015,
chr11	87861552	87861861	intronic_lncRNA_1000	+	87861552,	87861861,
chr11	88176298	88177115	intronic_lncRNA_1001	+	88176298,	88177115,
chr11	88558636	88558933	intronic_lncRNA_1002	-	88558636,	88558933,
chr11	88702883	88703120	intronic_lncRNA_1003	-	88702883,	88703120,
chr11	90500152	90500684	intronic_lncRNA_1004	-	90500152,	90500684,
chr11	90515424	90516212	intronic_lncRNA_1005	-	90515424,	90516212,
chr11	93748699	93801020	intronic_lncRNA_1006	+	93748699,93753335,93754505,93755045,93756074,93765355,93765960,93800540,	93749030,93753727,93754972,93755519,93756441,93765644,93766166,93801020,
chr11	93767801	93768270	intronic_lncRNA_1007	+	93767801,	93768270,
chr11	93974355	93974566	intronic_lncRNA_1008	+	93974355,	93974566,
chr11	93980010	93980222	intronic_lncRNA_1009	+	93980010,	93980222,
chr11	94274893	94276244	intronic_lncRNA_1010	-	94274893,	94276244,
chr11	94286642	94286860	intronic_lncRNA_1011	-	94286642,	94286860,
chr11	94333106	94333868	intronic_lncRNA_1012	+	94333106,	94333868,
chr11	95247220	95247618	intronic_lncRNA_1013	+	95247220,	95247618,
chr11	95250655	95250976	intronic_lncRNA_1014	+	95250655,	95250976,
chr11	95578893	95579202	intronic_lncRNA_1015	-	95578893,	95579202,
chr11	95611672	95613231	intronic_lncRNA_1016	+	95611672,95612832,	95611961,95613231,
chr11	96628477	96628799	intronic_lncRNA_1017	+	96628477,	96628799,
chr11	96636010	96636681	intronic_lncRNA_1018	-	96636010,	96636681,
chr11	96684220	96684438	intronic_lncRNA_1019	-	96684220,	96684438,
chr11	96902989	96909341	intronic_lncRNA_1020	+	96902989,96903934,96904474,96904936,96905401,96906694,96908900,	96903525,96904344,96904885,96905171,96905831,96907421,96909341,
chr11	97354018	97354350	intronic_lncRNA_1021	-	97354018,	97354350,
chr11	97379057	97435374	intronic_lncRNA_1022	-	97379057,97435135,	97379653,97435374,
chr11	97527796	97539186	intronic_lncRNA_1023	+	97527796,97534004,97538604,97538914,	97528100,97534753,97538851,97539186,
chr11	97604423	97604643	intronic_lncRNA_1024	-	97604423,	97604643,
chr11	97903334	97903682	intronic_lncRNA_1025	+	97903334,	97903682,
chr11	97986762	97987029	intronic_lncRNA_1026	-	97986762,	97987029,
chr11	98108412	98122003	intronic_lncRNA_1027	+	98108412,98117592,98118592,98120556,98121310,	98108629,98118127,98119517,98120910,98122003,
chr11	98189786	98190657	intronic_lncRNA_1028	+	98189786,	98190657,
chr11	98237046	98237697	intronic_lncRNA_1029	+	98237046,	98237697,
chr11	98704990	98705243	intronic_lncRNA_1030	+	98704990,	98705243,
chr11	98706639	98707031	intronic_lncRNA_1031	+	98706639,	98707031,
chr11	100296622	100297101	intronic_lncRNA_1032	+	100296622,	100297101,
chr11	100307789	100308398	intronic_lncRNA_1033	+	100307789,	100308398,
chr11	100481713	100482582	intronic_lncRNA_1034	+	100481713,	100482582,
chr11	100611135	100611544	intronic_lncRNA_1035	-	100611135,	100611544,
chr11	100757338	100757600	intronic_lncRNA_1036	-	100757338,	100757600,
chr11	100921383	100922150	intronic_lncRNA_1037	+	100921383,100921878,	100921590,100922150,
chr11	100922930	100923219	intronic_lncRNA_1038	+	100922930,	100923219,
chr11	100963423	100963663	intronic_lncRNA_1039	-	100963423,	100963663,
chr11	101025029	101025323	intronic_lncRNA_1040	-	101025029,	101025323,
chr11	101038123	101041367	intronic_lncRNA_1041	+	101038123,101041097,	101038539,101041367,
chr11	101055159	101055456	intronic_lncRNA_1042	-	101055159,	101055456,
chr11	101056305	101056832	intronic_lncRNA_1043	-	101056305,	101056832,
chr11	101116886	101117157	intronic_lncRNA_1044	+	101116886,	101117157,
chr11	101187998	101189656	intronic_lncRNA_1045	+	101187998,101188395,101189265,	101188330,101189049,101189656,
chr11	101272769	101273009	intronic_lncRNA_1046	-	101272769,	101273009,
chr11	101286961	101294635	intronic_lncRNA_1047	+	101286961,101287922,101294216,	101287819,101289317,101294635,
chr11	101610008	101610232	intronic_lncRNA_1048	+	101610008,	101610232,
chr11	101633731	101634414	intronic_lncRNA_1049	-	101633731,	101634414,
chr11	102051825	102053058	intronic_lncRNA_1050	+	102051825,	102053058,
chr11	102080900	102081964	intronic_lncRNA_1051	-	102080900,102081610,	102081127,102081964,
chr11	102083848	102085502	intronic_lncRNA_1052	-	102083848,102084107,102084429,102085091,	102084060,102084371,102084643,102085502,
chr11	102178654	102178893	intronic_lncRNA_1053	-	102178654,	102178893,
chr11	102179441	102180159	intronic_lncRNA_1054	+	102179441,	102180159,
chr11	102262372	102262595	intronic_lncRNA_1055	-	102262372,	102262595,
chr11	102370144	102370477	intronic_lncRNA_1056	+	102370144,	102370477,
chr11	102372788	102373063	intronic_lncRNA_1057	-	102372788,	102373063,
chr11	102374442	102376077	intronic_lncRNA_1058	-	102374442,102375633,	102375101,102376077,
chr11	102377142	102381310	intronic_lncRNA_1059	+	102377142,102377399,102379603,102380902,	102377388,102378002,102379947,102381310,
chr11	102382446	102383277	intronic_lncRNA_1060	-	102382446,102382893,	102382699,102383277,
chr11	102392768	102393471	intronic_lncRNA_1061	-	102392768,102393165,	102393102,102393471,
chr11	102636060	102636283	intronic_lncRNA_1062	+	102636060,	102636283,
chr11	102664248	102667016	intronic_lncRNA_1063	-	102664248,102665089,102666748,	102664683,102665329,102667016,
chr11	102667339	102667800	intronic_lncRNA_1064	-	102667339,	102667800,
chr11	102671981	102673815	intronic_lncRNA_1065	-	102671981,102673534,	102672320,102673815,
chr11	102701697	102701979	intronic_lncRNA_1066	-	102701697,	102701979,
chr11	102883265	102886441	intronic_lncRNA_1067	-	102883265,102885339,102885905,	102884164,102885752,102886441,
chr11	102970067	102971205	intronic_lncRNA_1068	+	102970067,	102971205,
chr11	102994872	102995108	intronic_lncRNA_1069	+	102994872,	102995108,
chr11	103235753	103236501	intronic_lncRNA_1070	+	103235753,103236184,	103236032,103236501,
chr11	104026224	104030273	intronic_lncRNA_1071	+	104026224,104027151,104027728,104028694,104029408,	104026625,104027403,104028245,104029362,104030273,
chr11	104179564	104179820	intronic_lncRNA_1072	+	104179564,	104179820,
chr11	104304572	104304954	intronic_lncRNA_1073	-	104304572,	104304954,
chr11	104989186	104997849	intronic_lncRNA_1074	+	104989186,104989696,104996997,104997580,	104989635,104990017,104997373,104997849,
chr11	105768429	105769324	intronic_lncRNA_1075	+	105768429,	105769324,
chr11	105802868	105803437	intronic_lncRNA_1076	-	105802868,	105803437,
chr11	106031193	106031763	intronic_lncRNA_1077	-	106031193,106031559,	106031506,106031763,
chr11	106037339	106042104	intronic_lncRNA_1078	-	106037339,106039793,106040201,106041009,106041444,	106038844,106040064,106040554,106041324,106042104,
chr11	106042323	106044528	intronic_lncRNA_1079	+	106042323,106043074,	106042963,106044528,
chr11	106044635	106044847	intronic_lncRNA_1080	-	106044635,	106044847,
chr11	106045308	106048406	intronic_lncRNA_1081	-	106045308,106046027,106047537,	106045667,106046823,106048406,
chr11	106130514	106133333	intronic_lncRNA_1082	-	106130514,106133107,	106130907,106133333,
chr11	106632491	106633180	intronic_lncRNA_1083	-	106632491,	106633180,
chr11	106661774	106678739	intronic_lncRNA_1084	+	106661774,106662463,106675205,106678402,	106662332,106662762,106675424,106678739,
chr11	106671691	106671898	intronic_lncRNA_1085	+	106671691,	106671898,
chr11	106898711	106899005	intronic_lncRNA_1086	-	106898711,	106899005,
chr11	106899391	106901130	intronic_lncRNA_1087	-	106899391,106900028,106900777,	106899702,106900693,106901130,
chr11	107074133	107074962	intronic_lncRNA_1088	-	107074133,	107074962,
chr11	107078332	107079095	intronic_lncRNA_1089	-	107078332,107078776,	107078622,107079095,
chr11	107082817	107083236	intronic_lncRNA_1090	-	107082817,	107083236,
chr11	108532508	108533057	intronic_lncRNA_1091	-	108532508,	108533057,
chr11	109088930	109091037	intronic_lncRNA_1092	-	109088930,109089468,109090310,	109089283,109090261,109091037,
chr11	109111614	109115597	intronic_lncRNA_1093	-	109111614,109112526,109112816,109113665,109114111,109114966,	109112416,109112795,109113610,109114032,109114393,109115597,
chr11	109233232	109233522	intronic_lncRNA_1094	+	109233232,	109233522,
chr11	109317588	109317914	intronic_lncRNA_1095	-	109317588,	109317914,
chr11	109330926	109333027	intronic_lncRNA_1096	-	109330926,109331577,	109331315,109333027,
chr11	110136948	110137346	intronic_lncRNA_1097	-	110136948,	110137346,
chr11	110375802	110384317	intronic_lncRNA_1098	+	110375802,110377795,110378589,110384060,	110376453,110378221,110380506,110384317,
chr11	113057792	113058238	intronic_lncRNA_1099	+	113057792,	113058238,
chr11	113550730	113553041	intronic_lncRNA_1100	+	113550730,113551639,	113551136,113553041,
chr11	113564978	113567397	intronic_lncRNA_1101	+	113564978,113565984,113567108,	113565867,113566872,113567397,
chr11	113569081	113569381	intronic_lncRNA_1102	+	113569081,	113569381,
chr11	115127922	115128302	intronic_lncRNA_1103	-	115127922,	115128302,
chr11	115221129	115221631	intronic_lncRNA_1104	-	115221129,	115221631,
chr11	115245168	115251818	intronic_lncRNA_1105	+	115245168,115245902,115246424,115247036,115248684,115250063,115250758,	115245836,115246363,115246781,115248386,115249304,115250397,115251818,
chr11	115265619	115265902	intronic_lncRNA_1106	+	115265619,	115265902,
chr11	115267571	115267863	intronic_lncRNA_1107	+	115267571,	115267863,
chr11	115270171	115270552	intronic_lncRNA_1108	+	115270171,	115270552,
chr11	115444374	115444623	intronic_lncRNA_1109	+	115444374,	115444623,
chr11	115449319	115449621	intronic_lncRNA_1110	-	115449319,	115449621,
chr11	115451091	115451385	intronic_lncRNA_1111	-	115451091,	115451385,
chr11	115469929	115470372	intronic_lncRNA_1112	+	115469929,	115470372,
chr11	115482458	115482682	intronic_lncRNA_1113	-	115482458,	115482682,
chr11	115484406	115484685	intronic_lncRNA_1114	-	115484406,	115484685,
chr11	115678432	115679274	intronic_lncRNA_1115	+	115678432,115678985,	115678755,115679274,
chr11	115679373	115680454	intronic_lncRNA_1116	-	115679373,	115680454,
chr11	115914478	115917145	intronic_lncRNA_1117	+	115914478,115916662,	115914792,115917145,
chr11	116011431	116011781	intronic_lncRNA_1118	-	116011431,	116011781,
chr11	116028573	116028861	intronic_lncRNA_1119	-	116028573,	116028861,
chr11	116044197	116044414	intronic_lncRNA_1120	+	116044197,	116044414,
chr11	116202161	116202635	intronic_lncRNA_1121	-	116202161,	116202635,
chr11	116337001	116338233	intronic_lncRNA_1122	-	116337001,116337993,	116337487,116338233,
chr11	116544106	116544544	intronic_lncRNA_1123	-	116544106,	116544544,
chr11	116727713	116728157	intronic_lncRNA_1124	+	116727713,	116728157,
chr11	116829982	116834986	intronic_lncRNA_1125	+	116829982,116830840,116831264,116831815,116832943,116834759,	116830313,116831053,116831649,116832082,116833210,116834986,
chr11	117519719	117519959	intronic_lncRNA_1126	+	117519719,	117519959,
chr11	117549798	117550121	intronic_lncRNA_1127	-	117549798,	117550121,
chr11	117585710	117616606	intronic_lncRNA_1128	+	117585710,117586429,117588340,117601329,117602585,117616235,	117586125,117586650,117588553,117602373,117602899,117616606,
chr11	117591373	117591663	intronic_lncRNA_1129	+	117591373,	117591663,
chr11	117681242	117681897	intronic_lncRNA_1130	+	117681242,	117681897,
chr11	117686310	117686840	intronic_lncRNA_1131	-	117686310,	117686840,
chr11	117870378	117880216	intronic_lncRNA_1132	+	117870378,117871896,117875142,117879037,117879885,	117870740,117872933,117875446,117879550,117880216,
chr11	117893119	117893468	intronic_lncRNA_1133	+	117893119,	117893468,
chr11	118039342	118041394	intronic_lncRNA_1134	-	118039342,118039989,118040970,	118039926,118040426,118041394,
chr11	118042462	118043165	intronic_lncRNA_1135	-	118042462,118042919,	118042769,118043165,
chr11	118270636	118270872	intronic_lncRNA_1136	-	118270636,	118270872,
chr11	118946033	118946592	intronic_lncRNA_1137	-	118946033,	118946592,
chr11	119119288	119119673	intronic_lncRNA_1138	+	119119288,	119119673,
chr11	119237151	119238471	intronic_lncRNA_1139	+	119237151,119238240,	119237989,119238471,
chr11	119338712	119339212	intronic_lncRNA_1140	+	119338712,	119339212,
chr11	119864915	119867665	intronic_lncRNA_1141	+	119864915,119865710,119867325,	119865329,119866383,119867665,
chr11	119873752	119874014	intronic_lncRNA_1142	-	119873752,	119874014,
chr11	119968765	119968999	intronic_lncRNA_1143	-	119968765,	119968999,
chr11	119970407	119970734	intronic_lncRNA_1144	-	119970407,	119970734,
chr11	120109011	120109230	intronic_lncRNA_1145	+	120109011,	120109230,
chr11	120210179	120211559	intronic_lncRNA_1146	+	120210179,	120211559,
chr11	120327643	120327844	intronic_lncRNA_1147	-	120327643,	120327844,
chr11	120408043	120408268	intronic_lncRNA_1148	-	120408043,	120408268,
chr11	120472731	120472941	intronic_lncRNA_1149	-	120472731,	120472941,
chr11	120478307	120478530	intronic_lncRNA_1150	-	120478307,	120478530,
chr11	120480412	120481420	intronic_lncRNA_1151	-	120480412,120480952,	120480914,120481420,
chr11	120492834	120494609	intronic_lncRNA_1152	-	120492834,	120494609,
chr11	120569080	120569300	intronic_lncRNA_1153	+	120569080,	120569300,
chr11	120740667	120741322	intronic_lncRNA_1154	-	120740667,	120741322,
chr11	120832015	120832251	intronic_lncRNA_1155	-	120832015,	120832251,
chr11	121066235	121066932	intronic_lncRNA_1156	+	121066235,	121066932,
chr11	121107453	121107713	intronic_lncRNA_1157	+	121107453,	121107713,
chr11	121118737	121119096	intronic_lncRNA_1158	+	121118737,	121119096,
chr11	121285345	121286236	intronic_lncRNA_1159	+	121285345,	121286236,
chr11	121479510	121480541	intronic_lncRNA_1160	-	121479510,	121480541,
chr11	121481157	121482778	intronic_lncRNA_1161	+	121481157,121482466,	121481791,121482778,
chr11	121487092	121487867	intronic_lncRNA_1162	-	121487092,	121487867,
chr11	121492781	121493438	intronic_lncRNA_1163	-	121492781,	121493438,
chr12	3241816	3243201	intronic_lncRNA_1164	+	3241816,3242277,	3242218,3243201,
chr12	3244156	3246581	intronic_lncRNA_1165	-	3244156,3244585,3246036,	3244430,3245757,3246581,
chr12	3392003	3400781	intronic_lncRNA_1166	-	3392003,3393148,3400532,	3392251,3393519,3400781,
chr12	3427356	3427589	intronic_lncRNA_1167	+	3427356,	3427589,
chr12	3772867	3778931	intronic_lncRNA_1168	+	3772867,3774109,3777653,3778606,	3773544,3774557,3778020,3778931,
chr12	3827529	3827868	intronic_lncRNA_1169	+	3827529,	3827868,
chr12	3975715	3976267	intronic_lncRNA_1170	-	3975715,	3976267,
chr12	3979463	3979932	intronic_lncRNA_1171	-	3979463,	3979932,
chr12	3984823	3985134	intronic_lncRNA_1172	+	3984823,	3985134,
chr12	4193648	4194159	intronic_lncRNA_1173	-	4193648,	4194159,
chr12	4196031	4196622	intronic_lncRNA_1174	-	4196031,	4196622,
chr12	4249916	4251467	intronic_lncRNA_1175	-	4249916,4250654,	4250394,4251467,
chr12	4862259	4863588	intronic_lncRNA_1176	+	4862259,4863000,	4862799,4863588,
chr12	4889662	4889902	intronic_lncRNA_1177	-	4889662,	4889902,
chr12	4967578	4968022	intronic_lncRNA_1178	+	4967578,	4968022,
chr12	8940565	8940905	intronic_lncRNA_1179	+	8940565,	8940905,
chr12	9001291	9001578	intronic_lncRNA_1180	+	9001291,	9001578,
chr12	10398459	10399958	intronic_lncRNA_1181	+	10398459,10399716,	10398982,10399958,
chr12	16664478	16664915	intronic_lncRNA_1182	+	16664478,	16664915,
chr12	16820033	16822728	intronic_lncRNA_1183	+	16820033,16821415,	16820270,16822728,
chr12	16997785	16998101	intronic_lncRNA_1184	+	16997785,	16998101,
chr12	16998306	16999025	intronic_lncRNA_1185	+	16998306,	16999025,
chr12	17001393	17001831	intronic_lncRNA_1186	-	17001393,	17001831,
chr12	17373739	17374165	intronic_lncRNA_1187	+	17373739,	17374165,
chr12	20902516	20905554	intronic_lncRNA_1188	-	20902516,20903958,20904889,20905334,	20902738,20904579,20905301,20905554,
chr12	21207358	21207593	intronic_lncRNA_1189	+	21207358,	21207593,
chr12	21265711	21270547	intronic_lncRNA_1190	-	21265711,21265982,21267203,	21265914,21266796,21270547,
chr12	21308371	21308632	intronic_lncRNA_1191	+	21308371,	21308632,
chr12	21327864	21328952	intronic_lncRNA_1192	+	21327864,	21328952,
chr12	21335055	21335700	intronic_lncRNA_1193	-	21335055,	21335700,
chr12	25203205	25231839	intronic_lncRNA_1194	+	25203205,25204500,25205749,25207200,25207527,25229312,25229694,25230255,25231374,	25203455,25205646,25206150,25207431,25207925,25229564,25230186,25231004,25231839,
chr12	25736863	25737074	intronic_lncRNA_1195	+	25736863,	25737074,
chr12	25745283	25745960	intronic_lncRNA_1196	+	25745283,	25745960,
chr12	29339888	29341186	intronic_lncRNA_1197	+	29339888,29340651,	29340435,29341186,
chr12	29387112	29387655	intronic_lncRNA_1198	-	29387112,	29387655,
chr12	30219288	30219769	intronic_lncRNA_1199	+	30219288,	30219769,
chr12	31269969	31271922	intronic_lncRNA_1200	+	31269969,31270850,31271409,	31270277,31271314,31271922,
chr12	32011779	32012486	intronic_lncRNA_1201	+	32011779,	32012486,
chr12	32312440	32312793	intronic_lncRNA_1202	-	32312440,	32312793,
chr12	33640785	33641270	intronic_lncRNA_1203	+	33640785,	33641270,
chr12	33653171	33656055	intronic_lncRNA_1204	+	33653171,33653841,33654555,33655854,	33653431,33654340,33654776,33656055,
chr12	33657808	33658987	intronic_lncRNA_1205	+	33657808,	33658987,
chr12	33818345	33819455	intronic_lncRNA_1206	-	33818345,	33819455,
chr12	33825283	33825718	intronic_lncRNA_1207	+	33825283,	33825718,
chr12	33828902	33829286	intronic_lncRNA_1208	-	33828902,	33829286,
chr12	40754645	40759241	intronic_lncRNA_1209	-	40754645,40755919,40756542,40757076,40757805,40758847,	40755592,40756144,40756921,40757659,40758114,40759241,
chr12	41520034	41520273	intronic_lncRNA_1210	+	41520034,	41520273,
chr12	41520611	41570515	intronic_lncRNA_1211	+	41520611,41561326,41562041,41567888,	41520936,41561608,41562633,41570515,
chr12	41563365	41564342	intronic_lncRNA_1212	+	41563365,	41564342,
chr12	42212773	42213119	intronic_lncRNA_1213	-	42212773,	42213119,
chr12	45679408	45685684	intronic_lncRNA_1214	+	45679408,45685003,45685406,	45679725,45685209,45685684,
chr12	47802665	47802916	intronic_lncRNA_1215	-	47802665,	47802916,
chr12	47919063	47919298	intronic_lncRNA_1216	-	47919063,	47919298,
chr12	50491038	50505912	intronic_lncRNA_1217	+	50491038,50496189,50500184,50501819,50504022,50505658,	50491369,50496431,50500526,50502092,50505023,50505912,
chr12	50498652	50498862	intronic_lncRNA_1218	+	50498652,	50498862,
chr12	52464545	52471536	intronic_lncRNA_1219	+	52464545,52470422,52471119,	52464815,52470740,52471536,
chr12	52466921	52468664	intronic_lncRNA_1220	+	52466921,52467795,	52467706,52468664,
chr12	52695294	52696319	intronic_lncRNA_1221	+	52695294,52695625,52696080,	52695522,52695981,52696319,
chr12	52711557	52714879	intronic_lncRNA_1222	-	52711557,52711982,52713418,	52711850,52712549,52714879,
chr12	52718937	52719161	intronic_lncRNA_1223	-	52718937,	52719161,
chr12	52729352	52729626	intronic_lncRNA_1224	-	52729352,	52729626,
chr12	52731074	52731305	intronic_lncRNA_1225	-	52731074,	52731305,
chr12	52732567	52732876	intronic_lncRNA_1226	-	52732567,	52732876,
chr12	52736184	52736752	intronic_lncRNA_1227	+	52736184,	52736752,
chr12	52742988	52743318	intronic_lncRNA_1228	-	52742988,	52743318,
chr12	52744528	52745036	intronic_lncRNA_1229	-	52744528,	52745036,
chr12	52745150	52745835	intronic_lncRNA_1230	-	52745150,	52745835,
chr12	52747946	52748315	intronic_lncRNA_1231	-	52747946,	52748315,
chr12	52777122	52777362	intronic_lncRNA_1232	-	52777122,	52777362,
chr12	52834802	52839309	intronic_lncRNA_1233	+	52834802,52835305,52836279,52838854,	52835194,52836038,52836560,52839309,
chr12	53094641	53094980	intronic_lncRNA_1234	-	53094641,	53094980,
chr12	53898530	53898892	intronic_lncRNA_1235	+	53898530,	53898892,
chr12	53930275	53930772	intronic_lncRNA_1236	-	53930275,	53930772,
chr12	54353805	54354123	intronic_lncRNA_1237	+	54353805,	54354123,
chr12	56153215	56153710	intronic_lncRNA_1238	-	56153215,	56153710,
chr12	56386409	56387502	intronic_lncRNA_1239	-	56386409,	56387502,
chr12	56394094	56394571	intronic_lncRNA_1240	-	56394094,	56394571,
chr12	56396112	56397238	intronic_lncRNA_1241	-	56396112,56396888,	56396386,56397238,
chr12	56967266	56969112	intronic_lncRNA_1242	+	56967266,56968130,56968805,	56967616,56968549,56969112,
chr12	57431542	57432280	intronic_lncRNA_1243	-	57431542,57432005,	57431845,57432280,
chr12	57437035	57437751	intronic_lncRNA_1244	-	57437035,	57437751,
chr12	57439157	57439541	intronic_lncRNA_1245	-	57439157,	57439541,
chr12	57439691	57441176	intronic_lncRNA_1246	-	57439691,	57441176,
chr12	60277515	60280829	intronic_lncRNA_1247	+	60277515,60278639,60280608,	60278302,60279605,60280829,
chr12	60318987	60319427	intronic_lncRNA_1248	-	60318987,	60319427,
chr12	62780982	62781407	intronic_lncRNA_1249	+	62780982,	62781407,
chr12	66023513	66023792	intronic_lncRNA_1250	+	66023513,	66023792,
chr12	66150545	66152027	intronic_lncRNA_1251	+	66150545,	66152027,
chr12	66152167	66153464	intronic_lncRNA_1252	+	66152167,	66153464,
chr12	66153642	66153880	intronic_lncRNA_1253	+	66153642,	66153880,
chr12	66236464	66236854	intronic_lncRNA_1254	+	66236464,	66236854,
chr12	67771632	67772266	intronic_lncRNA_1255	-	67771632,	67772266,
chr12	68082789	68083581	intronic_lncRNA_1256	-	68082789,	68083581,
chr12	68186269	68190250	intronic_lncRNA_1257	-	68186269,68188090,68189959,	68186580,68188460,68190250,
chr12	68194529	68198597	intronic_lncRNA_1258	-	68194529,68197018,68198191,	68196673,68197411,68198597,
chr12	68198765	68211450	intronic_lncRNA_1259	-	68198765,68201427,68202315,68202825,68205290,68207480,68209514,68211169,	68201195,68202069,68202567,68203112,68206135,68207937,68209804,68211450,
chr12	68253835	68254142	intronic_lncRNA_1260	-	68253835,	68254142,
chr12	68256644	68257446	intronic_lncRNA_1261	-	68256644,	68257446,
chr12	68285717	68288000	intronic_lncRNA_1262	+	68285717,68287140,68287458,68287749,	68287001,68287381,68287698,68288000,
chr12	68292999	68299607	intronic_lncRNA_1263	-	68292999,68295132,68295938,68297028,68299346,	68293538,68295541,68296444,68297467,68299607,
chr12	68309544	68312431	intronic_lncRNA_1264	-	68309544,68311686,	68309931,68312431,
chr12	70415974	70416368	intronic_lncRNA_1265	-	70415974,	70416368,
chr12	70426495	70427576	intronic_lncRNA_1266	-	70426495,	70427576,
chr12	70679419	70679709	intronic_lncRNA_1267	-	70679419,	70679709,
chr12	70679870	70680354	intronic_lncRNA_1268	-	70679870,	70680354,
chr12	70826927	70838872	intronic_lncRNA_1269	+	70826927,70838642,	70827159,70838872,
chr12	70891901	70892341	intronic_lncRNA_1270	+	70891901,	70892341,
chr12	70908400	70909453	intronic_lncRNA_1271	-	70908400,70908756,70909077,	70908672,70909009,70909453,
chr12	70910412	70911620	intronic_lncRNA_1272	-	70910412,70911221,	70910696,70911620,
chr12	70918177	70918593	intronic_lncRNA_1273	-	70918177,	70918593,
chr12	70922443	70922800	intronic_lncRNA_1274	-	70922443,	70922800,
chr12	70925036	70925317	intronic_lncRNA_1275	-	70925036,	70925317,
chr12	71078116	71081864	intronic_lncRNA_1276	-	71078116,71080180,71081442,	71078898,71080718,71081864,
chr12	71118909	71119572	intronic_lncRNA_1277	-	71118909,	71119572,
chr12	71123381	71126364	intronic_lncRNA_1278	-	71123381,71125171,71125947,	71124649,71125788,71126364,
chr12	71136897	71138869	intronic_lncRNA_1279	-	71136897,71137598,71138535,	71137590,71138177,71138869,
chr12	71350626	71351074	intronic_lncRNA_1280	+	71350626,	71351074,
chr12	71352486	71352990	intronic_lncRNA_1281	-	71352486,	71352990,
chr12	71353658	71356012	intronic_lncRNA_1282	-	71353658,	71356012,
chr12	71356397	71364515	intronic_lncRNA_1283	-	71356397,71357093,71357545,71358037,71361575,	71356633,71357334,71358019,71360280,71364515,
chr12	72096060	72097251	intronic_lncRNA_1284	+	72096060,	72097251,
chr12	72108852	72110580	intronic_lncRNA_1285	-	72108852,	72110580,
chr12	72111684	72115238	intronic_lncRNA_1286	-	72111684,72112357,72113668,72114837,	72112047,72112712,72114404,72115238,
chr12	72337332	72337697	intronic_lncRNA_1287	+	72337332,	72337697,
chr12	72340785	72341327	intronic_lncRNA_1288	+	72340785,	72341327,
chr12	73175205	73175819	intronic_lncRNA_1289	-	73175205,	73175819,
chr12	73187348	73189923	intronic_lncRNA_1290	+	73187348,73189665,	73189497,73189923,
chr12	73192613	73193635	intronic_lncRNA_1291	+	73192613,	73193635,
chr12	73649742	73652242	intronic_lncRNA_1292	+	73649742,73651102,	73650114,73652242,
chr12	74416835	74443770	intronic_lncRNA_1293	+	74416835,74418037,74418556,74419087,74434285,74436961,74443538,	74417809,74418491,74418977,74419304,74436101,74437241,74443770,
chr12	75049687	75050109	intronic_lncRNA_1294	+	75049687,	75050109,
chr12	77884531	78003232	intronic_lncRNA_1295	+	77884531,78002967,	77886421,78003232,
chr12	80241880	80248250	intronic_lncRNA_1296	+	80241880,80245245,80247992,	80242824,80247785,80248250,
chr12	80255113	80256654	intronic_lncRNA_1297	-	80255113,80255900,	80255844,80256654,
chr12	80272280	80272869	intronic_lncRNA_1298	-	80272280,	80272869,
chr12	80340575	80340807	intronic_lncRNA_1299	-	80340575,	80340807,
chr12	81229502	81229752	intronic_lncRNA_1300	-	81229502,	81229752,
chr12	81270390	81270594	intronic_lncRNA_1301	-	81270390,	81270594,
chr12	81271351	81271560	intronic_lncRNA_1302	-	81271351,	81271560,
chr12	81590820	81592081	intronic_lncRNA_1303	+	81590820,81591878,	81591407,81592081,
chr12	81611079	81611457	intronic_lncRNA_1304	-	81611079,	81611457,
chr12	81777517	81777748	intronic_lncRNA_1305	+	81777517,	81777748,
chr12	81957384	81957626	intronic_lncRNA_1306	+	81957384,	81957626,
chr12	82049036	82049679	intronic_lncRNA_1307	+	82049036,	82049679,
chr12	82481167	82481516	intronic_lncRNA_1308	-	82481167,	82481516,
chr12	82489740	82489981	intronic_lncRNA_1309	-	82489740,	82489981,
chr12	82675946	82676998	intronic_lncRNA_1310	-	82675946,82676628,	82676465,82676998,
chr12	82677118	82678217	intronic_lncRNA_1311	+	82677118,82677796,	82677453,82678217,
chr12	82678390	82678728	intronic_lncRNA_1312	-	82678390,	82678728,
chr12	82678977	82679242	intronic_lncRNA_1313	-	82678977,	82679242,
chr12	83063376	83063590	intronic_lncRNA_1314	+	83063376,	83063590,
chr12	83549661	83550068	intronic_lncRNA_1315	-	83549661,	83550068,
chr12	83821308	83821567	intronic_lncRNA_1316	+	83821308,	83821567,
chr12	84871891	84873219	intronic_lncRNA_1317	+	84871891,84872319,	84872255,84873219,
chr12	85140128	85140456	intronic_lncRNA_1318	-	85140128,	85140456,
chr12	85153169	85154853	intronic_lncRNA_1319	+	85153169,85153833,	85153740,85154853,
chr12	85159161	85159703	intronic_lncRNA_1320	-	85159161,	85159703,
chr12	85168143	85168477	intronic_lncRNA_1321	-	85168143,	85168477,
chr12	85172161	85172577	intronic_lncRNA_1322	-	85172161,	85172577,
chr12	85478509	85478984	intronic_lncRNA_1323	-	85478509,	85478984,
chr12	85672052	85680178	intronic_lncRNA_1324	+	85672052,85678735,85679972,	85672540,85679288,85680178,
chr12	85675129	85675518	intronic_lncRNA_1325	+	85675129,	85675518,
chr12	85711340	85711662	intronic_lncRNA_1326	+	85711340,	85711662,
chr12	85764543	85765052	intronic_lncRNA_1327	+	85764543,	85765052,
chr12	85765154	85765402	intronic_lncRNA_1328	+	85765154,	85765402,
chr12	85766799	85767370	intronic_lncRNA_1329	+	85766799,	85767370,
chr12	85777994	85778325	intronic_lncRNA_1330	-	85777994,	85778325,
chr12	85951736	85952095	intronic_lncRNA_1331	-	85951736,	85952095,
chr12	86262831	86263151	intronic_lncRNA_1332	-	86262831,	86263151,
chr12	86455573	86455861	intronic_lncRNA_1333	+	86455573,	86455861,
chr12	86467938	86468250	intronic_lncRNA_1334	+	86467938,	86468250,
chr12	86481427	86481777	intronic_lncRNA_1335	-	86481427,	86481777,
chr12	86481827	86484966	intronic_lncRNA_1336	-	86481827,86482474,86483680,	86482112,86483643,86484966,
chr12	86644997	86646223	intronic_lncRNA_1337	-	86644997,86645474,86645753,	86645368,86645704,86646223,
chr12	86647521	86647912	intronic_lncRNA_1338	-	86647521,	86647912,
chr12	87158219	87159169	intronic_lncRNA_1339	-	87158219,	87159169,
chr12	87498765	87500649	intronic_lncRNA_1340	+	87498765,87500433,	87498978,87500649,
chr12	87501661	87502088	intronic_lncRNA_1341	+	87501661,	87502088,
chr12	88026918	88027668	intronic_lncRNA_1342	+	88026918,	88027668,
chr12	88295044	88295671	intronic_lncRNA_1343	+	88295044,	88295671,
chr12	88297520	88300387	intronic_lncRNA_1344	+	88297520,88299211,88299943,	88298369,88299605,88300387,
chr12	88323080	88324034	intronic_lncRNA_1345	-	88323080,	88324034,
chr12	88328446	88329019	intronic_lncRNA_1346	+	88328446,	88329019,
chr12	88394781	88418842	intronic_lncRNA_1347	+	88394781,88395728,88396907,88418506,	88395474,88396114,88397315,88418842,
chr12	88399220	88399485	intronic_lncRNA_1348	+	88399220,	88399485,
chr12	88454967	88455465	intronic_lncRNA_1349	-	88454967,	88455465,
chr12	88489584	88499729	intronic_lncRNA_1350	+	88489584,88491679,88495419,88499528,	88489893,88492096,88495917,88499729,
chr12	88516208	88516768	intronic_lncRNA_1351	+	88516208,	88516768,
chr12	88770346	88772176	intronic_lncRNA_1352	+	88770346,88771578,	88771550,88772176,
chr12	88776109	88776718	intronic_lncRNA_1353	-	88776109,	88776718,
chr12	90089936	91559587	intronic_lncRNA_1354	+	90089936,91559145,	90090476,91559587,
chr12	90162394	90162742	intronic_lncRNA_1355	+	90162394,	90162742,
chr12	90163252	90163569	intronic_lncRNA_1356	+	90163252,	90163569,
chr12	90169366	90169581	intronic_lncRNA_1357	+	90169366,	90169581,
chr12	90252822	90255662	intronic_lncRNA_1358	-	90252822,90253620,90253980,90254915,90255317,	90253086,90253954,90254592,90255222,90255662,
chr12	90819098	90819535	intronic_lncRNA_1359	+	90819098,	90819535,
chr12	90822973	90824571	intronic_lncRNA_1360	+	90822973,90823501,90824030,	90823436,90823950,90824571,
chr12	90825421	90828230	intronic_lncRNA_1361	+	90825421,90825852,90826416,	90825646,90826136,90828230,
chr12	90848795	90849344	intronic_lncRNA_1362	+	90848795,	90849344,
chr12	90851322	90852489	intronic_lncRNA_1363	+	90851322,	90852489,
chr12	90852933	90853493	intronic_lncRNA_1364	+	90852933,	90853493,
chr12	90856618	90856885	intronic_lncRNA_1365	-	90856618,	90856885,
chr12	90876080	90877321	intronic_lncRNA_1366	+	90876080,	90877321,
chr12	90877493	90881503	intronic_lncRNA_1367	+	90877493,90878079,90879189,90880420,90881095,	90877825,90879135,90880415,90880791,90881503,
chr12	90894506	90894793	intronic_lncRNA_1368	+	90894506,	90894793,
chr12	90896347	90896916	intronic_lncRNA_1369	+	90896347,	90896916,
chr12	90904885	90910219	intronic_lncRNA_1370	+	90904885,90905211,90907262,90909280,90909794,	90905154,90906959,90907852,90909647,90910219,
chr12	90914337	90914657	intronic_lncRNA_1371	+	90914337,	90914657,
chr12	90915702	90916012	intronic_lncRNA_1372	+	90915702,	90916012,
chr12	90937031	90938072	intronic_lncRNA_1373	+	90937031,90937604,	90937481,90938072,
chr12	90939444	90943705	intronic_lncRNA_1374	+	90939444,90940493,90941552,90943307,	90939782,90941211,90942134,90943705,
chr12	90943751	90944370	intronic_lncRNA_1375	+	90943751,	90944370,
chr12	90944429	90944630	intronic_lncRNA_1376	+	90944429,	90944630,
chr12	90945681	90947784	intronic_lncRNA_1377	+	90945681,90947438,	90947402,90947784,
chr12	90947831	90948501	intronic_lncRNA_1378	-	90947831,	90948501,
chr12	90956056	90956440	intronic_lncRNA_1379	+	90956056,	90956440,
chr12	90956711	90957135	intronic_lncRNA_1380	+	90956711,	90957135,
chr12	90957898	90958247	intronic_lncRNA_1381	+	90957898,	90958247,
chr12	91013161	91014068	intronic_lncRNA_1382	+	91013161,91013830,	91013440,91014068,
chr12	91530486	91530740	intronic_lncRNA_1383	+	91530486,	91530740,
chr12	92827165	92827577	intronic_lncRNA_1384	+	92827165,	92827577,
chr12	92828142	92828454	intronic_lncRNA_1385	-	92828142,	92828454,
chr12	93060512	93060784	intronic_lncRNA_1386	+	93060512,	93060784,
chr12	96955131	96956135	intronic_lncRNA_1387	+	96955131,96955406,	96955393,96956135,
chr12	96956267	96956741	intronic_lncRNA_1388	-	96956267,	96956741,
chr12	99496723	99496932	intronic_lncRNA_1389	-	99496723,	99496932,
chr12	99869523	99869814	intronic_lncRNA_1390	+	99869523,	99869814,
chr12	99999481	99999730	intronic_lncRNA_1391	+	99999481,	99999730,
chr12	100020283	100021085	intronic_lncRNA_1392	+	100020283,100020741,	100020658,100021085,
chr12	100022293	100022521	intronic_lncRNA_1393	+	100022293,	100022521,
[truncated: 6,095 more rows]
