# Supplementary material for: Identification and Characterization of Long Non-Coding RNAs Related to Mouse Embryonic Brain Development from Available Transcriptomic Data
Source: PLoS One. 2013 Aug 14;8(8):e71152. doi: 10.1371/journal.pone.0071152 (PMC3743905; doi:10.1371/journal.pone.0071152)
Supplement: Table S3 — Full list of putative embryonic brain lncRNAs. (XLS) [file pone.0071152.s008.xls]

## Sheet: Table S3
Supplementary Table S3 Full list of putative embryonic brain lncRNAs.
ID	Genomic position	Start (for multi-exon)	End (for multi-exon)	Flanking gene	Type	Selective expression in embryonic stages
LncRNA_1	chr12:110933585-110937816	110933796,	110934339,	Rian, Mir882, Mirg	Intergenic	Yes
		110936837,	110937816,
LncRNA_2	chr4:109123415-109125140			Rnf11	Intergenic	No
LncRNA_3	chr4:141095035-141095689			Spen	Intergenic	Yes
LncRNA_4	chr13:28547317-28551720			AK012007	Intergenic	Yes
LncRNA_5	chr11:77025409-77027210			SSh2	Intergenic	Yes
LncRNA_6	chr12:110851295-110852785	110851295,	110851396,	Rian	Intronic	Yes
		110852747,	110852785,
