# Supplementary material for: Identification and Characterization of Long Non-Coding RNAs Related to Mouse Embryonic Brain Development from Available Transcriptomic Data
Source: PLoS One. 2013 Aug 14;8(8):e71152. doi: 10.1371/journal.pone.0071152 (PMC3743905; doi:10.1371/journal.pone.0071152)
Supplement: Table S7 — Primer designs for six putative embryonic brain lncRNAs. (XLS) [file pone.0071152.s012.xls]

## Sheet: Table S7
Supplementary Table S7 Primer designs for six putative embryonic brain lncRNAs.
ID	Chr	Start	End	Type	Primer Sequence*
LncRNA_1	12	110933669	110934339	Fwd	5' AGAAGATTTGAAAAGTATGTTGGCA 3'
				Rev	5' AGAAGATTTGAAAAGTATGTTGGCA 3'
LncRNA_2	4	109125121	109125428	Fwd	5' CATTGCTTAGATTCCCAGTAGAT 3'
				Rev	5' AACTTCAGCTGTTTCCTCCA 3'
LncRNA_4	13	28549317	28549613	Fwd	5' TGTATGTCTGGCTGGCACTTT 3'
				Rev	5' CCATGTCTTGCTCAGGGATT 3'
LncRNA_5	11	77026020	77026288	Fwd	5' CTAGTTCTGCTTACAGCTCCTTCA 3'
				Rev	5' TTTATGGCTGTCAGGATGTGG 3'
LncRNA_3	4	141095035	141095345	Fwd	5' CGGAAGGTTTGGAATAGTTG 3'
				Rev	5' GGTATGAAAAATTAAAGTATGAGTTG 3'
LncRNA_6	12	110851256	110851494	Fwd	5' TCCAAAGTGAGGAATGAAAGATGA 3'
				Rev	5' GGTCCACTAACCCCTTATGACTCTC 3'
